# Supplementary material for: The Niwot Ridge Subalpine Forest US-NR1 AmeriFlux site – Part I: Data acquisition and site record-keeping
Source: Copernicus journal article supplement (doi:10.5194/gi-2016-17), 2016-06-14
Supplement: Supplementary file 1 [file gi-2016-17-supplement.zip]

Below is a listing of the Data Loggers used at the CU Ameriflux Site.

**CNR Logger:**

| Start Date               | End Date     | CSI File                                       | Parameters                        | Channels | Example Data File              | Photo                 | Comments                                                                                                                                             |
|--------------------------|--------------|------------------------------------------------|-----------------------------------|----------|--------------------------------|-----------------------|------------------------------------------------------------------------------------------------------------------------------------------------------|
| Nov 19, 2007             | present      | <a href="#">rad_03.csi</a>                     | <a href="#">rad_03.csi.params</a> | NaN      | <a href="#">(add later)</a>    |                       | On 19 Nov 2007: no longer saving 5-min SW_net, LW_net, Albedo, rad_net in logger files. No changes to 1-hz data output.                              |
| Sep 13, 2006             | Nov 19, 2007 | <a href="#">rad_02.csi</a>                     | <a href="#">rad_02.csi.params</a> | NaN      | <a href="#">(add later)</a>    | <a href="#">photo</a> | On 13 Sep 2006: increased the number of 5-min data saved (include calculated Radiation). Also, added jumper wires to low-side of differential input. |
| Jan 6, 2006              | Sep 13, 2006 | <a href="#">rad_01.csi</a> (no program change) | <a href="#">rad_01.csi.params</a> | NaN      | <a href="#">(add later)</a>    | <a href="#">photo</a> | On 6 Jan 2006: connected T.case and moved the photodiode sensors to the proper inputs.                                                               |
| Jan 3, 2006 (~12:00 MST) | Jan 6, 2006  | <a href="#">rad_01.csi</a>                     | <a href="#">rad_01.csi.params</a> | NaN      | <a href="#">(add later)</a>    | <a href="#">photo</a> | On 3 Jan 2006: uploaded the new program (rad_01.csi) and connected SW/LW wires for the cnr1 (except for T.case).                                     |
| Dec 16, 2005             | Jan 3, 2003  | <a href="#">RAD.CSI</a> (no program change)    | <a href="#">RAD.CSI.params</a>    | NaN      | <a href="#">cnr_050506.dat</a> | <a href="#">photo</a> | On 16 Dec 2005: Added CNR-1 sensor and connected incoming SW to logger (no mod to cnr logger program).                                               |
| Oct 4, 2004              | Dec 16, 2005 | <a href="#">RAD.CSI</a>                        | <a href="#">RAD.CSI.params</a>    | NaN      | <a href="#">cnr_050506.dat</a> | <a href="#">photo</a> | On 4 Oct 2004, Added photodiode sensors and a 2nd PAR sensor.                                                                                        |
| Jun 4, 2004              | Oct 4, 2004  | <a href="#">CNR30B.CSI</a>                     | <a href="#">CNR30B.CSI.params</a> | NaN      | <a href="#">cnr_040712.dat</a> | <a href="#">photo</a> | on 4 Jun 2004, removed extra parameters output to the data system (ops13).                                                                           |
| Feb 13, 2004             | Jun 4, 2004  | <a href="#">CNR30B_old.CSI</a>                 | <a href="#">CNR30B.CSI.params</a> | NaN      | <a href="#">cnr_040712.dat</a> | <a href="#">photo</a> | on Feb 13th, added the borrowed KZ PSP sensor from ATD/EOL (SN 940185)                                                                               |
| Jun 2, 2003              | Feb 13, 2004 | <a href="#">CNR30.CSI</a>                      | NaN                               | NaN      | <a href="#">NaN</a>            | <a href="#">photo</a> | on 2 Jun 2003 started saving 5-min data; on 5 Dec, 2003 Brant and I removed P.Blankens CNR-1                                                         |

**FAST Logger (for co2 flux):**

| Start Date   | End Date         | CSI File                     | Parameters | Channels | Example Data File | Photo | Comments                                                                                                                                                                                                                                          |
|--------------|------------------|------------------------------|------------|----------|-------------------|-------|---------------------------------------------------------------------------------------------------------------------------------------------------------------------------------------------------------------------------------------------------|
| May 17, 2010 | present          | <a href="#">fast_12.csi</a>  |            | NaN      | NaN               | NaN   | on may 17, 2010, streamlined slightly, now runs ok at 10-hz (with thermocouple).                                                                                                                                                                  |
| May 5, 2010  | May 17, 2010     | <a href="#">fast_11.csi</a>  |            | NaN      | NaN               | NaN   | on may 5, 2010, added 10-hz thermocouple (note, logger could not run at 10-hz!).                                                                                                                                                                  |
| Sep 27, 2009 | May 5, 2010      | <a href="#">fast_10.csi</a>  |            | NaN      | NaN               | NaN   | on sep 27, 2009, added eol csat, cleaned out all the ozone stuff.                                                                                                                                                                                 |
| Jul 10, 2009 | Sep 27, 2009     | <a href="#">fast_09.csi</a>  |            | NaN      | NaN               | NaN   | on jul 10, 2009, replaced li-6262 with spare, change h2o.ec back to +/- 1000mV.                                                                                                                                                                   |
| Jun 25, 2009 | Jul 10, 2009     | <a href="#">fast_08.csi</a>  |            | NaN      | NaN               | NaN   | on jun 25 2009, changed range of co2.ec.b (now h2o.ec!) to be +/- 1000 mV                                                                                                                                                                         |
| Oct 24, 2008 | Jun 25, 2009     | <a href="#">fast_07.csi</a>  |            | NaN      | NaN               | NaN   | on oct 24 2008, removed az2_L, az2_X, added 2nd co2.ec channel.                                                                                                                                                                                   |
| Sep 30, 2008 | Oct 24, 2008     | <a href="#">fast_06.csi</a>  |            | NaN      | NaN               | NaN   | on sep 30 2008, added 4 more parameters to fast logger (for the accelerometers, az1_L, az1_X, az2_L, az2_X).                                                                                                                                      |
| Sep 26, 2007 | Sep 30, 2008     | <a href="#">fast_05.csi</a>  |            | NaN      | NaN               | NaN   | on sep 26 2007, removed fast ozone parameters (same as fast_03.csi).                                                                                                                                                                              |
| Apr 3, 2007  | Sep 26, 2007     | <a href="#">fast_04.csi</a>  |            | NaN      | NaN               | NaN   | on apr 3 2007, added back the ozone parameters (except for poz1).                                                                                                                                                                                 |
| Nov 26, 2006 | Apr 3, 2007      | <a href="#">fast_03.csi</a>  |            | NaN      | NaN               | NaN   | on nov 26, changed co2.ec range back to 5000 mV (otherwise really cold conditions clipped the co2.ec data). all the ozone parameters are still gone.                                                                                              |
| Oct 24, 2006 | Nov 26, 2006     | <a href="#">fast_02.csi</a>  |            | NaN      | NaN               | NaN   | on oct 24, kept co2.ec range at 1000 mV (it was co2.ec range =5000 mV). removed all the ozone parameters (now the logger can keep up). this works with ops33.                                                                                     |
| Oct 16, 2006 | Oct 24, 2006     | <a href="#">fast_01.csi</a>  |            | NaN      | NaN               | NaN   | on oct 16, changed co2 range back to 1000 mV (it was co2.ec range =5000 mV). (note, the sample rate dropped off a bit since the program couldn't keep up!). In doing this I also decreased the "offset" of co2.ec (with the dial on the li-6262). |
| Jun 3, 2005  | Oct 16, 2006     | <a href="#">FAST23X9.CSI</a> |            | NaN      | NaN               | NaN   | on jun3, went back to using FAST23X9.CSI (ie, co2.ec range =5000 mV).                                                                                                                                                                             |
| May 26, 2005 | Jun 3, 2005      | <a href="#">FAST2X10.CSI</a> |            | NaN      | NaN               | NaN   | on may 26: changed mV range for co2.ec from 5000 to 1000 mV (changed ref gas).                                                                                                                                                                    |
| Feb 11, 2005 | May 26, 2005     | <a href="#">FAST23X9.CSI</a> |            | NaN      | NaN               | NaN   | on feb 11 removed poz2 and poz3 (ozone pressure sensor data) from the data system.                                                                                                                                                                |
| Oct 9, 2004  | Feb 11, 2005     | <a href="#">FAST23X8.CSI</a> |            | NaN      | NaN               | NaN   | On oct8/9, Added 3 pressure sensors to the ozone flux system, started working on Oct 9th).                                                                                                                                                        |
| pre-2004     | before Oct, 2004 | <a href="#">FAST23X7.CSI</a> |            | NaN      | NaN               | NaN   | Original program by AT.                                                                                                                                                                                                                           |

**PROF Logger:**

| Start Date | End Date | CSI File | Parameters | Channels | Example Data File | Photo | Comments |
|------------|----------|----------|------------|----------|-------------------|-------|----------|
|------------|----------|----------|------------|----------|-------------------|-------|----------|

|              |              |                             |                                   |     |     |     |                                                                                           |
|--------------|--------------|-----------------------------|-----------------------------------|-----|-----|-----|-------------------------------------------------------------------------------------------|
| Jul 29, 2009 | present      | <a href="#">prf_02.csi</a>  | <a href="#">prf_02.csi.params</a> | NaN | NaN | NaN | on 7/29/09: added in the EOL "roaming" T/RH sensor...                                     |
| Nov 19, 2007 | Jul 29, 2009 | <a href="#">prf_01.csi</a>  | <a href="#">prf_01.csi.params</a> | NaN | NaN | NaN | on 11/19/07: stopped saving 1-min data. changed output from day,hr/min/sec to day,hr/min. |
| Jun 2, 2004  | Nov 19, 2007 | <a href="#">PROF30B.CSI</a> | <a href="#">PROF.CSI.params</a>   | NaN | NaN | NaN | Increased resolution of CO2 Li-6251. Changed order of zero/span.                          |
| pre-2003     | June 2, 2004 | <a href="#">PROF30B.CSI</a> | <a href="#">PROF.CSI.params</a>   | NaN | NaN | NaN | Original program by AT.                                                                   |

**MET Logger:**

| Start Date   | End Date     | CSI File                   | Parameters                        | Channels                           | Example Data File | Photo | Comments                                                                                                                                 |
|--------------|--------------|----------------------------|-----------------------------------|------------------------------------|-------------------|-------|------------------------------------------------------------------------------------------------------------------------------------------|
| Dec 13, 2007 | present      | <a href="#">met_06.csi</a> | <a href="#">met_06.csi.params</a> | Available DIFF channels: 2,4,12    | NaN               | NaN   | on 13 dec 2007: changed output of RM young prop-vanes to be in physical units (m/s and deg from true N). (no mod to ops file necessary). |
| Sep 26, 2007 | Dec 13, 2007 | <a href="#">met_05.csi</a> | <a href="#">met_05.csi.params</a> | Available DIFF channels: 2,4,12    | NaN               | NaN   | on 26 sep 2007, added another new T/RH sensor (#5) to chan ?. Sensor is at ~6m?                                                          |
| Jun 14, 2007 | Sep 26, 2007 | <a href="#">met_04.csi</a> | <a href="#">met_04.csi.params</a> | Available DIFF channels: 2,4,12    | NaN               | NaN   | on 14 june 2007, added new T/RH sensor (#4) to chan 11.                                                                                  |
| May 31, 2007 | Jun 14, 2007 | <a href="#">met_03.csi</a> | <a href="#">met_03.csi.params</a> | Available DIFF channels: 2,4,11,12 | NaN               | NaN   | on 31 may 2007: removed handar 9-m data from met logger program (chans 11 and 12).                                                       |
| May 30, 2007 | May 31, 2007 | <a href="#">met_02.csi</a> | <a href="#">met_02.csi.params</a> | NaN                                | NaN               | NaN   | started outputting prop-vane ws and wd in voltages (i.e., not converted to physical units).                                              |
| Apr 23, 2007 | May 30, 2007 | <a href="#">met_01.csi</a> | <a href="#">met_01.csi.params</a> | NaN                                |                   |       | on 23 april 2007: modified program so on restart it will close the span/zero valves in the li-6262 (EC) system.                          |
| May 13, 2003 | Apr 23, 2007 | <a href="#">MET30D.CSI</a> | <a href="#">MET30D.CSI.params</a> | NaN                                |                   |       | On 13 May, 2003, started saving 5-min data rather than 30-min data.                                                                      |
| Jul 21, 2001 | May 13, 2003 | <a href="#">MET30C.CSI</a> | <a href="#">MET30C.CSI.params</a> | NaN                                |                   |       |                                                                                                                                          |
| Oct 16, 2000 | Jul 21, 2001 | <a href="#">MET30B.CSI</a> | <a href="#">MET30B.CSI.params</a> | NaN                                |                   |       |                                                                                                                                          |
| Jul 5, 2000  | Oct 16, 2000 | <a href="#">MET30A.CSI</a> | <a href="#">MET30A.CSI.params</a> | NaN                                |                   |       |                                                                                                                                          |
| Jan 12, 2000 | Jul 5, 2000  | <a href="#">MET30.CSI</a>  | <a href="#">MET.CSI.params</a>    | NaN                                |                   |       | this was the second oldest version of the MET program i could find on the gateway (SpB).                                                 |
| Sep 21, 1999 | Jan 12, 2000 | <a href="#">MET.CSI</a>    | <a href="#">MET.CSI.params</a>    | NaN                                |                   |       | this was the oldest version of the MET program i could find on the gateway (SpB).                                                        |

**NCARTC Logger:**

| Start Date   | End Date     | CSI File                    | Parameters                     | Channels | Example Data File | Photo | Comments                                                                    |
|--------------|--------------|-----------------------------|--------------------------------|----------|-------------------|-------|-----------------------------------------------------------------------------|
| Oct 25, 2005 | present      | <a href="#">nctc_02.csi</a> | <a href="#">nctc_02.params</a> | NaN      |                   |       | on Oct 25, removed orst prt temperature sensor and re-connected channel 12. |
| Sep 29, 2005 | Oct 25, 2005 | <a href="#">nctc_01.csi</a> | <a href="#">nctc_01.params</a> | NaN      |                   |       | logged orst prt temperature sensor, gave up channel 12.                     |
| Oct 3, 2004  | Sep 29, 2005 | <a href="#">NCARTC.CSI</a>  | <a href="#">NCARTC.params</a>  | NaN      |                   |       | Added battery voltage (saved on logger)                                     |
| Sep, 2002    | Oct 3, 2004  | <a href="#">NCARTC.CSI</a>  | <a href="#">NCARTC.params</a>  | NaN      |                   |       | original program (S.Semmer).                                                |

**UCb Logger (formerly HYDRATC Logger):**

| Start Date   | End Date     | CSI File                     | Parameters                        | Channels | Example Data File | Photo                 | Comments                                                                                                                                                     |
|--------------|--------------|------------------------------|-----------------------------------|----------|-------------------|-----------------------|--------------------------------------------------------------------------------------------------------------------------------------------------------------|
| Sep 20, 2010 | present      | <a href="#">ucb_13.csi</a>   | <a href="#">ucb_13.csi.params</a> | NaN      | NaN               | NaN                   | on 20 Sept, 2010, changed thermocouple type from "T-type" to "E-type".                                                                                       |
| Aug 11, 2010 | Sep 20, 2010 | <a href="#">ucb_12.csi</a>   | <a href="#">ucb_12.csi.params</a> | NaN      | NaN               | NaN                   | on 11 Aug, 2010, changed ex. port for 257 probe from 1 to 3.                                                                                                 |
| Nov 6, 2009  | aug 11, 2010 | <a href="#">ucb_11.csi</a>   | <a href="#">ucb_11.csi.params</a> | NaN      | NaN               | NaN                   | on 6 Nov 2009, started outputting pressure sensor data (two sensors) to quacker (Pbaro.ucb & P.mpx).                                                         |
| Oct 31, 2008 | Nov 6, 2009  | <a href="#">ucb_10.csi</a>   | <a href="#">ucb_10.csi.params</a> | NaN      | NaN               | NaN                   | on 31 Oct, 2008, added a thermocouple to diff ch10.                                                                                                          |
| Aug 11, 2008 | Oct 31, 2008 | <a href="#">ucb_09.csi</a>   | <a href="#">ucb_09.csi.params</a> | NaN      | NaN               | NaN                   | ucb_09.csi Aug 11, 2008, JB. added the Vaisala 2-d sonic anemometer to diff channels 8 and 9; (the red and black power wires go to 12V and 5V, respectively) |
| Mar 19, 2008 | Aug 11, 2008 | <a href="#">ucb_08.csi</a>   | <a href="#">ucb_08.csi.params</a> | NaN      |                   | <a href="#">photo</a> | on 3/19/08, replaced jia's cr10x with the repaired cr23x (which was actually a battery problem!)...restored the ucb_08.csi program.                          |
| Feb 22, 2008 | Mar 19, 2008 | <a href="#">ucb10x_2.csi</a> | NaN                               | NaN      |                   |                       | on 2/22/08, modified program on the cr10x to try and get the cs616 to work (it didn't work).                                                                 |
| Feb 21, 2008 | Feb 22, 2008 | <a href="#">ucb10x_1.csi</a> | NaN                               | NaN      |                   |                       | on 2/21/08, borrowed a cr10x from jia to replace UCB/cr23x.                                                                                                  |

|                          |              |                            |                                   |     |                                |                       |                                                                                                                                                                            |
|--------------------------|--------------|----------------------------|-----------------------------------|-----|--------------------------------|-----------------------|----------------------------------------------------------------------------------------------------------------------------------------------------------------------------|
| Jul 17, 2007             | Feb 18, 2008 | <a href="#">ucb_08.csi</a> | <a href="#">ucb_08.csi.params</a> | NaN |                                | <a href="#">photo</a> | on 2/18/08, UCB cr23x logger stops working!                                                                                                                                |
| Oct 1, 2006              | Jul 17, 2007 | <a href="#">ucb_07.csi</a> | <a href="#">ucb_07.csi.params</a> | NaN |                                | <a href="#">photo</a> | on Oct 1, added shorthaul modem (output to the quacker is in ASCII format)                                                                                                 |
| Sep 19, 2006             | Oct 1, 2006  | <a href="#">ucb_06.csi</a> | <a href="#">ucb_06.csi.params</a> | NaN |                                | <a href="#">photo</a> | added honeywell ASCX15AN pressure sensor to SE chan22, outputting Pbaro_hw instead of Rnet to quacker (but in 5-min data all are saved, ie no columns goes from 10 to 11). |
| Oct 25, 2005             | Sep 19, 2006 | <a href="#">ucb_05.csi</a> | <a href="#">ucb_05.csi.params</a> | NaN |                                | <a href="#">photo</a> | started saving 107L Temperature data! + serial output to data system.                                                                                                      |
| Oct 15, 2005             | Oct 25, 2005 | <a href="#">ucb_04.csi</a> | <a href="#">ucb_04.csi.params</a> | NaN |                                | <a href="#">photo</a> | Added 107L Temperature sensor                                                                                                                                              |
| Oct 8, 2005              | Oct 15, 2005 | <a href="#">ucb_03.csi</a> | NaN                               | NaN |                                | <a href="#">photo</a> | Added cs616 Water Content probe                                                                                                                                            |
| Sep 20, 2005             | Oct 8, 2005  | <a href="#">ucb_02.csi</a> | NaN                               | NaN |                                | <a href="#">photo</a> | added 257l soil wetness sensor sensor (buried on Sept 29th)                                                                                                                |
| Jul 21, 2005 (10:40 MST) | Sep 20, 2005 | <a href="#">UCB_01.CSI</a> | NaN                               | NaN | <a href="#">ucb_050809.dat</a> | <a href="#">photo</a> | use to collect in-canopy radiation and gmp343 probe data                                                                                                                   |

**UC Logger:**

| Start Date               | End Date     | CSI File                          | Parameters | Channels | Example Data File             | Photo                 | Comments                                                                                                                         |
|--------------------------|--------------|-----------------------------------|------------|----------|-------------------------------|-----------------------|----------------------------------------------------------------------------------------------------------------------------------|
| Aug 4, 2009              | present      | <a href="#">uc_03.csi</a>         | NaN        | NaN      | NaN                           | NaN                   | on 4 aug 2009, stopped saving 5-min averages; li-7500 data inputs are SDM, output back to 10-hz.                                 |
| Jul 29, 2009             | Aug 4, 2009  | <a href="#">uc_02.csi</a>         | NaN        | NaN      | NaN                           | NaN                   | 7/29/2009, collecting both analog and sdm output from li-7500 (but sample rate drops to 3 hz?)...                                |
| Aug 11, 2008             | Jul 29, 2009 | <a href="#">uc_01.csi</a>         | NaN        | NaN      | NaN                           | NaN                   | version uc_01.csi (came from twosonic.csi); removed 2-d handar (added to uc logger). 8/11/08, spb.                               |
| Jul 14th, 2005           | Aug 11, 2008 | <a href="#">TWOSONIC.CSI</a>      | NaN        | NaN      | <a href="#">uc_050809.dat</a> | <a href="#">photo</a> | went back to running the old program (TWOSONIC.CSI).                                                                             |
| Jul 12, 2005 (10:00 MST) | Jul 14, 2005 | <a href="#">UC01.CSI</a>          | NaN        | NaN      | <a href="#">uc_050714.dat</a> | <a href="#">photo</a> | tried to add some additional instruments, but this caused the 10-hz data to get screwed up.                                      |
| Jan 20, 2005 (? MST)     | Jul 12, 2005 | <a href="#">TWOSONIC.CSI</a>      | NaN        | NaN      | <a href="#">uc_050311.dat</a> | <a href="#">photo</a> | On 01/20/05: Removed the GMP343 and re-installed the recalibrated li7500.                                                        |
| Nov 9, 2004              | Jan 20, 2005 | <a href="#">TWOSON2.CSI</a>       | NaN        | NaN      | <a href="#">uc_050120.dat</a> | <a href="#">photo</a> | Used to measure the GMP343 which was on se chan5 (where the li-7500 was connected). The li-7500 was sent back for recalibration. |
| Jun 5, 2003              | Nov 9, 2004  | <a href="#">TWOSONIC_orig.CSI</a> | NaN        | NaN      | <a href="#">uc_040608.dat</a> | <a href="#">photo</a> | Original program written by Andrew Turnipseed.                                                                                   |

**SOIL Logger:**

| Start Date               | End Date                 | CSI File                     | Parameters                      | Channels | Example Data File                | Photo                 | Comments                                                                                                                                                                     |
|--------------------------|--------------------------|------------------------------|---------------------------------|----------|----------------------------------|-----------------------|------------------------------------------------------------------------------------------------------------------------------------------------------------------------------|
| Oct 7, 2008              | present                  | <a href="#">soil_03.csi</a>  | <a href="#">soil_03.params</a>  | NaN      | <a href="#">soil_081007c.dat</a> | NaN                   | On Oct 7th 2008: Removed the period_n1 and period_n2 parameters for the two cs-616 sensors. Added a 2nd mux for 8 new cs-616 sensors (these are now saved as w616_1-w616_8). |
| Oct 26, 2007             | Oct 7, 2008              | <a href="#">soil_02.csi</a>  | <a href="#">soil_02.params</a>  | NaN      | <a href="#">soil_071030.dat</a>  | NaN                   | On Oct 26th 2007: Removed all the "tdr" parameters. Started saving all 25 temperatures from the am25t mux.                                                                   |
| Oct 16, 2005             | Oct 26, 2007             | <a href="#">soil_01.csi</a>  | <a href="#">soil_01.params</a>  | NaN      | <a href="#">soil_0510xx.dat</a>  | <a href="#">photo</a> | On Oct 15th: Removed 107L (se, chan9) and 2 thermocouples (diff, ch 8 and ch9). On Oct 16th: added 3 thermocouples to am25T mux and 2 csi 616l soil moisture sensors.        |
| Jun 30, 2005 (13:00 MST) | Oct 16, 2005             | <a href="#">soilsno2.csi</a> | <a href="#">soilsno2.params</a> | NaN      | <a href="#">soil_050705.dat</a>  | <a href="#">photo</a> | Added a new temperature sensor (csi 107-L) to chan 9 (se) and ouput battery voltage.                                                                                         |
| Oct 29, 2003             | Jun 30, 2005 (13:00 MST) | <a href="#">SOILSNOW.CSI</a> | <a href="#">SOILSNOW.params</a> | NaN      | <a href="#">soil_031104.dat</a>  | NaN                   | This program was used for soil sensors at the hydra locations (between CU tower and N Canopy tower).                                                                         |
| Aug 3, 2003              | Oct 29, 2003             | <a href="#">SOIL23XC.CSI</a> | <a href="#">SOIL23XC.params</a> | NaN      | <a href="#">soil_030901.dat</a>  | NaN                   | This program was used in summer 2003, the program was modified during the hydra setup in Oct 2003.                                                                           |

**TC Logger:**

| Start Date   | End Date     | CSI File                  | Parameters                   | Channels | Example Data File | Photo | Comments                                                                                                                                                                                                                                                                                                        |
|--------------|--------------|---------------------------|------------------------------|----------|-------------------|-------|-----------------------------------------------------------------------------------------------------------------------------------------------------------------------------------------------------------------------------------------------------------------------------------------------------------------|
| Mar 21, 2014 | Present      | <a href="#">tc_13.csi</a> | <a href="#">tc_13.params</a> | NaN      |                   |       | on 21 Mar 2014, added snothrm IR sensor, in the output, T_snothrm replaced the THP sensor (which is no longer present). On 21 Sep 2015, replaced broken am25t (mux1, sn 1616) with spare am25t (sn 4370) (still using tc_13.csi). On 2 Nov 2015, added old TC sensors back to tc logger (still using tc_13.csi) |
| Oct 13, 2006 | Mar 21, 2014 | <a href="#">tc_12.csi</a> | <a href="#">tc_12.params</a> | NaN      |                   |       | on oct13, reconnected the repaired am25t (sn 1396) to tc23x logger (ie, am25t on the ground)                                                                                                                                                                                                                    |

|              |              |                                       |                                |     |                               |                       |                                                                                                                                                                                                                                                                                  |
|--------------|--------------|---------------------------------------|--------------------------------|-----|-------------------------------|-----------------------|----------------------------------------------------------------------------------------------------------------------------------------------------------------------------------------------------------------------------------------------------------------------------------|
| Oct 12, 2006 | Oct 13, 2006 | <a href="#">tc_11.csi</a>             | <a href="#">tc_11.params</a>   | NaN |                               |                       |                                                                                                                                                                                                                                                                                  |
| Oct 6, 2006  | Oct 12, 2006 | <a href="#">tc_10.csi</a>             | <a href="#">tc_10.params</a>   | NaN |                               |                       |                                                                                                                                                                                                                                                                                  |
| Oct 5, 2006  | Oct 6, 2006  | <a href="#">tc_09.csi</a>             | <a href="#">tc_09.params</a>   | NaN |                               |                       |                                                                                                                                                                                                                                                                                  |
| Sep 29, 2006 | Oct 5, 2006  | <a href="#">tc_08.csi</a>             | <a href="#">tc_08.params</a>   | NaN |                               |                       |                                                                                                                                                                                                                                                                                  |
| Sep 24, 2006 | Sep 29, 2006 | <a href="#">tc_07.csi</a>             | <a href="#">tc_07.params</a>   | NaN |                               |                       | on sep 24, reconnected the repaired am25t (sn 1616) back to tc23x logger                                                                                                                                                                                                         |
| Aug 31, 2006 | Sep 24, 2006 | <a href="#">tc_06.csi</a>             | <a href="#">tc_06.params</a>   | NaN |                               |                       |                                                                                                                                                                                                                                                                                  |
| Aug 29, 2006 | Aug 31, 2006 | <a href="#">tc_05.csi</a>             | <a href="#">tc_05.params</a>   | NaN |                               |                       |                                                                                                                                                                                                                                                                                  |
| Aug 24, 2006 | Aug 29, 2006 | <a href="#">tc_04.csi</a>             | <a href="#">tc_04.params</a>   | NaN |                               |                       |                                                                                                                                                                                                                                                                                  |
| Aug 22, 2006 | Aug 24, 2006 | <a href="#">tc_03.csi</a>             | <a href="#">tc_03.params</a>   | NaN |                               |                       |                                                                                                                                                                                                                                                                                  |
| Oct 8, 2005  | Aug 22, 2006 | <a href="#">tc_02.csi</a> (no change) | <a href="#">tc_02.params</a>   | NaN |                               |                       | Lightning strike on 17 Jul 2006 knocked out the two am25t muxes. On Aug 22 started to mess around with program.                                                                                                                                                                  |
| Sep 20, 2005 | Oct 8, 2005  | <a href="#">tc_02.csi</a> (no change) | <a href="#">tc_02.params</a>   | NaN | <a href="#">tc_050912.dat</a> | <a href="#">photo</a> | On 20 Sep: Connected more TCs to the AM25T (no change to the program).                                                                                                                                                                                                           |
| Sep 15, 2005 | Sep 20, 2005 | <a href="#">tc_02.csi</a>             | <a href="#">tc_02.params</a>   | NaN | NaN                           | <a href="#">photo</a> | added an AM25T to the box which is on the ground (connected several TCs, but some are still not connected).                                                                                                                                                                      |
| Jul 19, 2005 | Sep 15, 2005 | <a href="#">TC_01.CSI</a>             | <a href="#">TC_01.params</a>   | NaN | <a href="#">tc_050719.dat</a> | <a href="#">photo</a> | On 19 Jul 2005: swapped out the AM25T in the logger box with the repaired one (sn 1616). Started using the am25t reference temp sensor again.                                                                                                                                    |
| Apr 7, 2004  | Jul 19, 2005 | <a href="#">TC23X05.CSI</a>           | <a href="#">TC23X05.params</a> | NaN | NaN                           | NaN                   | AM25T ref thermistor not working properly. On 7 Apr 2004: Ref. Temperature seemed dead in the am25t. Modified program accordingly (used panel temp for reference).                                                                                                               |
| Apr 1, 2004  | Apr 7, 2004  | <a href="#">TC23X04.CSI</a>           |                                |     |                               |                       | Modified program to sample at 5-min (TC23X04.CSI). intervals instead of 10-min (TC23X03.CSI).                                                                                                                                                                                    |
| Oct 29, 2003 | Apr 1, 2004  | <a href="#">TC23X03.CSI</a>           |                                |     |                               |                       | Big Changes: Commented out muxs 2 and 3, Added the IR Thermometer. New Output Order: time tag, IR-thermometer. Ref temp of Mux 1, Tcs 1-25 (on Mux 1).                                                                                                                           |
| Aug 20, 2003 | Oct 29, 2003 | <a href="#">TC23XB.CSI</a>            |                                |     |                               |                       | Data saved every 10-min, panel temp is used as AM25T ref temperature (I think this is the AM25T in the same enclosure as the CR23X).                                                                                                                                             |
| Jun 11, 2002 | Aug 20, 2003 | <a href="#">TC23XB_ver1.csi</a>       |                                |     |                               |                       | This is a bit of a guess, but I found "TC23XB_ver1.csi" on the laptop with a date from 6/11/02. It is very similar to "TC23XB.CSI", except TC23XB.CSI uses the panel temp as the AM25 ref Temp (and the time interval is 15-min in "TC23XB_ver1.csi" and 10-min in "TC23XB.CSI". |

**HYDRATC Logger:**

| Date              | CSI File                   | Parameters | Channels | Comments                                                                            |
|-------------------|----------------------------|------------|----------|-------------------------------------------------------------------------------------|
| December 10, 2004 | <a href="#">SOILHY.CSI</a> |            |          | Added GMP343 probe (channel 12, SE chan 24). Stopped outputting of unused channels. |

**MRSTEMP Logger:**

| Start Date   | End Date     | CSI File                    | Parameters | Channels | Example Data File | Photo | Comments                                                                                  |
|--------------|--------------|-----------------------------|------------|----------|-------------------|-------|-------------------------------------------------------------------------------------------|
| Oct 4, 2007  | Present      | <a href="#">mrs_02.csi</a>  |            | NaN      |                   |       | on oct4 2007, started saving the 107 ref probe (that is in the box with the logger) data. |
| Oct 12, 2006 | Oct 4, 2007  | <a href="#">mrs_01.csi</a>  |            | NaN      |                   |       | on oct12, stopped collecting data from the broken snowtemp probe.                         |
| May 15, 2003 | Oct 12, 2006 | <a href="#">MRSTEMP.CSI</a> |            | NaN      |                   |       | Original program                                                                          |

**cr21x "Pressure" Logger:**

| Start Date   | End Date     | CSI File                    | Parameters | Channels | Example Data File | Photo | Comments                                                                          |
|--------------|--------------|-----------------------------|------------|----------|-------------------|-------|-----------------------------------------------------------------------------------|
| Oct 24, 2006 | Present      | <a href="#">21xp_02.csi</a> |            | NaN      |                   |       | On Oct 24, swapped tubing to pressure sensors, changed sample rate to 5hz.        |
| Oct 12, 2006 | Oct 24, 2006 | <a href="#">21xp_01.csi</a> |            |          |                   |       | added a cr21x logger to directly output data to quacker (nothing saved in logger) |

**WEST ROBOT Logger:**

| Start Date     | End Date     | CSI File                                                        | Parameters | Channels | Example Data File           | Photo                    | Comments                                                                                                                                                                                                                                                                                                                                                                                                                                                                                                                                                                                                                                                                                                                         |
|----------------|--------------|-----------------------------------------------------------------|------------|----------|-----------------------------|--------------------------|----------------------------------------------------------------------------------------------------------------------------------------------------------------------------------------------------------------------------------------------------------------------------------------------------------------------------------------------------------------------------------------------------------------------------------------------------------------------------------------------------------------------------------------------------------------------------------------------------------------------------------------------------------------------------------------------------------------------------------|
| June 8, 2007   | present      | <a href="#">auto26nw.csi</a>                                    |            |          |                             |                          | Written by Andy Schauer on June 1st, 2007. This program can be used year round, with only the necessary modification to the program via the logger keypad needed to switch to 4 flask (i.e. winter) sampling. From summer to winter do: *0 *4A AAAAAAAAA 1 A *0, that is a total of 9 A's after the *4A. Before pressing "1" you should see this in the screen (and if you don't, start over): 09: +0.0000. The *4A moves you to the user-adjustable value table and then the repeated As advance you to the 9th value, the season flag (0=summer, 1=winter). From winter to summer, either upload the program to the logger from the laptop or do the same as above, substituting 1 with 0 so the last three entires are 0 A *0 |
| Feb 4, 2006    | June 8, 2007 | <a href="#">auto25w.csi</a><br>(copied from auto25nw.csi, ver4) |            | NaN      |                             | <a href="#">no photo</a> | On 4 Feb 2006: uploaded the logger program, set the fudge day to "0" (Thur/Fri swaps).                                                                                                                                                                                                                                                                                                                                                                                                                                                                                                                                                                                                                                           |
| April 29, 2005 | Aug 26, 2005 | <a href="#">AUTO24W.CSI</a>                                     |            |          | <a href="#">050617w.dat</a> | <a href="#">no photo</a> | Version 24 is a modification of v 23E. AUTO_23e.CSI collects 2 midafternoon flasks, 11 night flasks, and then 2 more midafternoon flasks. The IRGA is always on with this program.<br><br>Fudge Day changed to "2"(08/26/05).                                                                                                                                                                                                                                                                                                                                                                                                                                                                                                    |

**EAST ROBOT Logger:**

| Start Date     | End Date     | CSI File                                                     | Parameters | Channels | Example Data File           | Photo                    | Comments                                                                               |
|----------------|--------------|--------------------------------------------------------------|------------|----------|-----------------------------|--------------------------|----------------------------------------------------------------------------------------|
| Feb 4, 2006    | Present      | <a href="#">auto25e.csi</a> (copied from auto25nw.csi, ver4) |            | NaN      |                             | <a href="#">no photo</a> | On 4 Feb 2006: uploaded the logger program, set the fudge day to "0" (Thur/Fri swaps). |
| April 29, 2005 | Aug 26, 2005 | <a href="#">AUTO24E.CSI</a>                                  |            |          | <a href="#">050617e.dat</a> | <a href="#">no photo</a> | Licor replaced on 07/12/05 by KR.<br><br>Fudge Day changed to "2"(08/26/05).           |

**Noah's cr10 logger:**

| Start Date         | End Date | CSI File                   | Parameters | Channels | Example Data File | Photo                    | Comments                                                                    |
|--------------------|----------|----------------------------|------------|----------|-------------------|--------------------------|-----------------------------------------------------------------------------|
| Sat. Nov. 17, 2007 | current  | <a href="#">noah_m.csi</a> | NaN        | NaN      | NaN               | <a href="#">no photo</a> | Noah was at Niwot Ridge on Sat. Nov. 17, 2007 to re-wire his logger/sensors |

[Sean Burns](#)

Last Modified: 11/11/2015 09:55:31
