# Supplementary material for: The Niwot Ridge Subalpine Forest US-NR1 AmeriFlux site – Part I: Data acquisition and site record-keeping
Source: Copernicus journal article supplement (doi:10.5194/gi-2016-17), 2016-06-14
Supplement: Supplementary file 3 [file gi-2016-17-supplement.zip]

# ***Supplemental File for “The Niwot Ridge Subalpine Forest US-NR1 AmeriFlux site – Part I: Data acquisition and site record-keeping”***

**by S. P. Burns et al.**

## **README for: USNR1\_logbook.zip**

**S. P. Burns et al.**

sean@ucar.edu

Date: May 12, 2016

This is an archive of the HTML files and tklog file that is used for the Niwot Ridge US-NR1 AmeriFlux site logbook. These HTML files are links in the webcalendar which can be found here:

<http://urquell.colorado.edu/calendar/>

with the full logbook shown here:

[http://urquell.colorado.edu/logbook/NIWOT\\_LOGBOOK.html](http://urquell.colorado.edu/logbook/NIWOT_LOGBOOK.html)

From the zip archive, the logbook can be viewed by using a web browser, such as:

firefox logbook/NIWOT\_LOGBOOK.html

The raw logbook program (tklog) requires the packages TclX (<https://sourceforge.net/projects/tclx/>) and wishx

Here are installation instructions from Gordon:

```
-----  
To: maclean@ucar.edu, sean.burns@Colorado.EDU  
Subject: Re: tklog  
Date: Thu, 04 Mar 2010 12:57:03 -0700  
From: Sean Burns <Sean.Burns@Colorado.EDU>
```

Hey Gordon,

thanks...worked perfectly...i put those tk files in:

```
/usr/local/PORTER/cuff/aster/util/tklog
```

and then copied over the old tklog files from the Sun computers into:

```
cp /usr/local/SOLARIS/aster/projects/NIWOT/logbook/tklog.log* /usr/local/PORTER/
```

and now it seems to work just fine (sees all the old entries, etc)...thanks!

SpB.

-----  
Date: Thu, 04 Mar 2010 12:32:14 -0700  
From: Gordon Maclean <maclean@ucar.edu>  
To: Sean Burns <sean@ucar.edu>  
Subject: tklog

Sean,

Copy /scr/tmp/maclean/tklog.tar.gz to russter.

Untar it where-ever you want. It will create a directory called tklog.

Do you usually run it via a "logbook" script? Generally that script sets the \$TKLOG\_PATH to where ever your tklog.log file is.

If you have a logbook script, you may have to update it to run the new tklog/tklog which you just untar'd.

Hope this makes some sense, and works for you,

Gordon

-----  
This is the tklog software and the "logbook" script which starts up the lobook:

```
sburns 90336 Mar  4 2010 /home/staff/sburns/tklog.tar.gz
sburns 1104 Oct 23 2000 /usr/local/PORTER/cuff/aster/scripts/logbook*
```

HTML version of the logbook:

```
lrwxrwxrwx 1 sburns httpd      18 Feb 14 2010 index.html -> NIWOT_LOGBOOK.html
-rw-rw-r-- 1 sburns httpd 2370044 Mar  2 11:43 Logbook_Contents.html
-rw-rw-r-- 1 sburns httpd  4014 Mar  2 11:43 NIWOT_LOGBOOK.html
-rw-r--r-- 1 sburns httpd  1860 Feb 10 2014 s_gaps_daily.diary
-rw-rw-r-- 1 sburns httpd 2136010 Mar  2 11:43 site_CU_26m_Tower_entries.html
-rw-rw-r-- 1 sburns httpd  46325 Mar  2 11:43 site_hydra_entries.html
-rw-rw-r-- 1 sburns httpd  44601 Mar  2 11:43 site_laser_entries.html
-rw-rw-r-- 1 sburns httpd 130798 Mar  2 11:43 site_none_entries.html
-rw-rw-r-- 1 sburns httpd  16762 Mar  2 11:43 site_quacker_entries.html
-rw-rw-r-- 1 sburns httpd  7271 Mar  2 11:43 site_robots_entries.html
-rw-rw-r-- 1 sburns httpd  16795 Mar  2 11:43 site_russter_entries.html
-rw-rw-r-- 1 sburns httpd  3347 Mar  2 11:43 site_UGSG_33m_Tower_entries.html
-rw-rw-r-- 1 sburns httpd  56774 Mar  2 11:43 type_bowling_entries.html
```

```

-rw-rw-r-- 1 sburns httpd 68556 Mar 2 11:43 type_data_processing_entries.html
-rw-rw-r-- 1 sburns httpd 32423 Mar 2 11:43 type_data_system_entries.html
-rw-rw-r-- 1 sburns httpd 1697 Mar 2 11:43 type_Dean's_profiler_entries.html
-rw-rw-r-- 1 sburns httpd 40896 Mar 2 11:43 type_equipment_purchases_entries.h
-rw-rw-r-- 1 sburns httpd 36516 Mar 2 11:43 type_hydra_entries.html
-rw-rw-r-- 1 sburns httpd 3461 Mar 2 11:43 type_instrument_problems_entries.h
-rw-rw-r-- 1 sburns httpd 852 Mar 2 11:43 type_LOG_entries.html
-rw-rw-r-- 1 sburns httpd 1830 Mar 2 11:43 type_ncar_thermocouples_entries.ht
-rw-rw-r-- 1 sburns httpd 2750 Mar 2 11:43 type_robots_entries.html
-rw-rw-r-- 1 sburns httpd 2834 Mar 2 11:43 type_science_note_entries.html
-rw-rw-r-- 1 sburns httpd 2169484 Mar 2 11:43 type_site_visit_entries.html
-rw-rw-r-- 1 sburns httpd 3868 Mar 2 11:43 type_To_Do_List_entries.html
-rw-rw-r-- 1 sburns httpd 1436 Mar 2 11:43 type_weather_event_entries.html

```

And the logbook entries in native format:

```

/usr/local/PORTER/cuff/aster/projects/NIWOT/logbook:
total 4408
drwxr-xr-x 2 sburns aster 4096 May 10 11:56 ./
drwxr-xr-x 92 sburns aster 4096 Oct 31 2014 ../
-rw-rw-rw- 1 sburns aster 2244839 May 10 11:56 tklog.log
-rw-rw-rw- 1 sburns aster 2244839 May 10 11:56 tklog.log.auto

```
