# Supplementary material for: The Niwot Ridge Subalpine Forest US-NR1 AmeriFlux site – Part I: Data acquisition and site record-keeping
Source: Copernicus journal article supplement (doi:10.5194/gi-2016-17), 2016-06-14
Supplement: Supplementary file 4 [file gi-2016-17-supplement.zip]

# ***Supplemental File for “The Niwot Ridge Subalpine Forest US-NR1 AmeriFlux site – Part I: Data acquisition and site record-keeping”***

**by S. P. Burns et al.**

## **README for: USNR1\_OPS\_nidas.zip**

**S. P. Burns et al.**

sean@ucar.edu

Date: May 12, 2016

This is an archive of the OPS files used with the NIDAS software. These files are used by `prep` to inform NIDAS which configuration to use. In contrast to the multiple ASTER OPS config files, in NIDAS a single XML file contains all the information.

Each OPS configuration is in a directory with the XML file inside it. For example, for OPS82 the files are:

```
dir /usr/local/aster/projects/NIWOT/ISFF/config/ops82/

-rw-r--r--  1 sburns aster 28838 Sep  4  2015 niwot_on_isffa_ops82.xml
-rw-rw-rw-  1 sburns aster 51835 Oct 19  2015 niwot_orig.xml
-rw-rw-rw-  1 sburns aster 50973 Feb 10 21:17 niwot.xml
```

A key file is “configs.xml” which looks like this:

```
more /usr/local/aster/projects/NIWOT/ISFF/config/configs.xml
<?xml version="1.0" encoding="ISO-8859-1"?>
<configs>
  <config name="niwot"
    xml="$ISFF/projects/$PROJECT/ISFF/config/niwot.xml"
    begin="2015 nov 2 23:19"
    end="2019 dec 31 00:00">
    <envvar name="$ENV_VAR_EXAMPLE" value="10m"/>
    <envvar name="T_RANGE" value="-10 20"/>
    <envvar name="UV_RANGE" value="-10 10"/>
    <envvar name="W_RANGE" value="-7 7"/>
    <envvar name="SPD_RANGE" value="-0.5 20"/>
    <envvar name="DIAG_RANGE" value="-1 16"/>
    <envvar name="LDIAG_RANGE" value="-0.5 1.5"/>
    <envvar name="DIR_RANGE" value="0 360"/>
    <envvar name="VIN_RANGE" value="10 15"/>
    <envvar name="I_RANGE" value="0 300"/>
  </config>
```

```

<config name="ops85"
  xml="$ISFF/projects/$PROJECT/ISFF/config/ops85/niwot.xml"
  begin="2015 oct 13 21:22"
  end="2015 nov 2 23:19">
</config>
<config name="ops84"
  xml="$ISFF/projects/$PROJECT/ISFF/config/ops84/niwot.xml"
  begin="2015 sep 30 14:30"
  end="2015 oct 13 21:22">
</config>
<config name="ops83"
  xml="$ISFF/projects/$PROJECT/ISFF/config/ops83/niwot.xml"
  begin="2015 sep 21 21:30"
  end="2015 sep 30 14:30">
</config>
<config name="ops82"
  xml="$ISFF/projects/$PROJECT/ISFF/config/ops82/niwot.xml"
  begin="2015 sep 04 20:52"
  end="2015 sep 21 21:30">
</config>
<config name="ops81"
  xml="$ISFF/projects/$PROJECT/ISFF/config/ops81/niwot.xml"
  begin="2015 aug 14 17:46"
  end="2015 sep 04 20:52">
</config>
<config name="ops80"
  xml="$ISFF/projects/$PROJECT/ISFF/config/ops80/niwot.xml"
  begin="2015 aug 6 18:52"
  end="2015 aug 14 17:46">
</config>
<config name="ops79"
  xml="$ISFF/projects/$PROJECT/ISFF/config/ops79/niwot.xml"
  begin="2015 jul 21 21:45"
  end="2015 aug 6 18:52">
</config>
<config name="ops78"
  xml="$ISFF/projects/$PROJECT/ISFF/config/ops78/niwot.xml"
  begin="2015 jul 17 17:45"
  end="2015 jul 21 21:45">
</config>
<config name="ops77"
  xml="$ISFF/projects/$PROJECT/ISFF/config/ops77/niwot.xml"
  begin="2015 jun 24 18:02"
  end="2015 jul 17 17:45">
</config>
<config name="ops76"
  xml="$ISFF/projects/$PROJECT/ISFF/config/ops76/niwot.xml"
  begin="2015 may 1 20:30"
  end="2015 jun 24 18:02">
</config>
<config name="ops75"
  xml="$ISFF/projects/$PROJECT/ISFF/config/ops75/niwot.xml"
  begin="2015 mar 1 04:25"
  end="2015 may 1 20:30">
</config>
<config name="ops74"
  xml="$ISFF/projects/$PROJECT/ISFF/config/ops74/niwot.xml"
  begin="2014 dec 10 18:33"
  end="2015 mar 1 04:25">

```

```

</config>
<config name="ops73"
  xml="$ISFF/projects/$PROJECT/ISFF/config/ops73/niwot.xml"
  begin="2014 nov 21 18:09"
  end="2014 dec 10 18:33">
</config>
<config name="ops72"
  xml="$ISFF/projects/$PROJECT/ISFF/config/ops72/niwot.xml"
  begin="2014 nov 6 21:13"
  end="2014 nov 21 18:09">
</config>
<config name="ops71"
  xml="$ISFF/projects/$PROJECT/ISFF/config/ops71/niwot.xml"
  begin="2014 oct 30 20:32"
  end="2014 nov 6 21:13">
</config>
<config name="ops70"
  xml="$ISFF/projects/$PROJECT/ISFF/config/ops70/niwot.xml"
  begin="2014 feb 1 00:00"
  end="2014 oct 30 20:32">
</config>

</configs>

```

The directories included in the zip archive are (within each directory is the XLM file for that particular OPS configuration):

Directories:

```
dir /usr/local/aster/projects/NIWOT/ISFF/config/
```

```

drwxr-xr-x  2 sburns aster  4096 Oct 27  2014 ops70/
drwxr-xr-x  2 sburns aster  4096 Oct 31  2014 ops71/
drwxr-xr-x  2 sburns aster  4096 Nov  7  2014 ops72/
drwxr-xr-x  2 sburns aster  4096 Jan 21  2015 ops73/
drwxr-xr-x  2 sburns aster  4096 Jan 21  2015 ops74/
drwxr-xr-x  2 sburns aster  4096 Feb  9 10:38 ops75/
drwxr-xr-x  2 sburns aster  4096 Feb  9 10:37 ops76/
drwxr-xr-x  2 sburns aster  4096 Feb  9 10:32 ops77/
drwxr-xr-x  2 sburns aster  4096 Feb  9 10:39 ops78/
drwxr-xr-x  2 sburns aster  4096 Feb  9 10:41 ops79/
drwxr-xr-x  2 sburns aster  4096 Feb  9 10:50 ops80/
drwxr-xr-x  2 sburns aster  4096 Feb  9 10:51 ops81/
drwxr-xr-x  2 sburns aster  4096 Feb 10 21:17 ops82/
drwxr-xr-x  2 sburns aster  4096 Feb 10 21:19 ops83/
drwxr-xr-x  2 sburns aster  4096 Oct 19  2015 ops84/
drwxr-xr-x  2 sburns aster  4096 Oct 19  2015 ops85/
drwxr-xr-x  2 sburns aster  4096 Nov  2  2015 ops86/

```
