# Supplementary material for: The Niwot Ridge Subalpine Forest US-NR1 AmeriFlux site – Part I: Data acquisition and site record-keeping
Source: Copernicus journal article supplement (doi:10.5194/gi-2016-17), 2016-06-14
Supplement: Supplementary file 7 [file gi-2016-17-supplement.zip]

```
% This is an archive of the web calendar used at the
% Niwot Ridge US-NR1 AmeriFlux site as described in:
%
% "The Niwot Ridge Subalpine Forest US-NR1 AmeriFlux site -- Part I:
%      Data acquisition and site record-keeping"
%
%
% Thu Apr  7 15:34:55 MDT 2016
% SpB  (sean.burns@colorado.edu)
```

For more info see:

<http://urquell.colorado.edu/calendar/>

to look at the calendar open the files in a web browser such as:

firefox calendar/index.html

or,

firefox calendar/2004.html

or,

firefox calendar/2012.6.html
