# Supplementary material for: The Niwot Ridge Subalpine Forest US-NR1 AmeriFlux site – Part I: Data acquisition and site record-keeping
Source: Copernicus journal article supplement (doi:10.5194/gi-2016-17), 2016-06-14
Supplement: Supplementary file 8 [file gi-2016-17-supplement.zip]

# ***Supplemental File for “The Niwot Ridge Subalpine Forest US-NR1 AmeriFlux site – Part I: Data acquisition and site record-keeping”***

**by S. P. Burns et al.**

## **README for: USNR1\_OPS\_aster.zip**

**S. P. Burns et al.**

sean@ucar.edu

Date: May 12, 2016

This is an archive of the OPS files used with the ASTER/ADAM-ATI and ASTER/NDAQ software. These files are used by `prep` to tell the ASTER software which configuration to use.

Each OPS configuration is in a directory with the “config” files. For example, for OPS66 these files are:

```
dir /usr/local/aster/projects/NIWOT/ops66/

total 84
drwxr-xr-x  2 sburns aster 4096 Oct  8  2013 ./
drwxr-xr-x 92 sburns aster 4096 Oct 31  2014 ../
-rw-r--r--  1 sburns aster 1465 Dec 10  2012 archive_config
-rw-r--r--  1 sburns aster 4368 May  7  2013 channel_config
-rw-r--r--  1 sburns aster 2735 Oct  8  2013 covar.config
-rw-r--r--  1 sburns aster  339 Jun 18  2004 ingest.conf
-rw-r--r--  1 sburns aster 7223 Oct  8  2013 prep.config
```

A key file is “ops.config” which looks like this:

```
more /usr/local/aster/projects/NIWOT/ops.config

ops1      1998 sep 14 00:00:00 - 1999 mar 17 17:00:00
ops1.4    1999 mar 17 17:00:00 - 1999 jun 21 17:00:00
ops1.5    1999 jun 21 17:00:00 - 2002 may 10 11:00:00
ops2      2002 may 10 11:00:00 - 2002 jul 07 12:00:00
ops3      2002 jul 07 12:00:00 - 2002 sep 04 17:00:00
ops4      2002 sep 04 17:00:00 - 2002 nov 22 14:00:00
ops5      2002 nov 22 14:00:00 - 2003 feb 19 16:00:00
ops6      2003 feb 19 16:00:00 - 2003 jun 10 16:00:00
ops7      2003 jun 10 16:00:00 - 2003 jun 30 18:00:00
ops8      2003 jun 30 18:00:00 - 2003 oct 17 16:00:00
```

|       |                      |   |                      |                                       |
|-------|----------------------|---|----------------------|---------------------------------------|
| ops9  | 2003 oct 17 16:00:00 | - | 2003 oct 21 11:00:00 |                                       |
| ops10 | 2003 oct 21 11:00:00 | - | 2004 jan 02 18:30:00 |                                       |
| ops11 | 2004 jan 02 18:30:00 | - | 2004 may 06 15:40:00 |                                       |
| ops12 | 2004 may 06 15:40:00 | - | 2004 jun 02 21:30:00 |                                       |
| ops13 | 2004 jun 02 21:30:00 | - | 2004 jun 04 19:00:00 |                                       |
| ops14 | 2004 jun 04 19:00:00 | - | 2004 oct 05 17:00:00 |                                       |
| ops15 | 2004 oct 05 17:00:00 | - | 2004 oct 08 21:12:00 |                                       |
| ops16 | 2004 oct 08 21:12:00 | - | 2004 oct 09 20:30:00 |                                       |
| ops17 | 2004 oct 09 20:30:00 | - | 2004 oct 10 23:07:00 |                                       |
| ops18 | 2004 oct 10 23:07:00 | - | 2004 nov 02 06:30:00 |                                       |
| ops19 | 2004 nov 02 06:30:00 | - | 2004 nov 03 20:44:00 |                                       |
| ops20 | 2004 nov 03 20:44:00 | - | 2005 feb 11 21:04:00 |                                       |
| ops21 | 2005 feb 11 21:04:00 | - | 2005 may 29 15:30:00 |                                       |
| ops22 | 2005 may 29 15:30:00 | - | 2005 jun 01 17:45:00 |                                       |
| ops23 | 2005 jun 01 17:45:00 | - | 2005 jun 07 17:15:00 |                                       |
| ops24 | 2005 jun 07 17:15:00 | - | 2005 oct 28 20:30:00 |                                       |
| ops25 | 2005 oct 28 20:30:00 | - | 2006 jan 03 18:57:02 |                                       |
| ops26 | 2006 jan 03 18:57:02 | - | 2006 jul 12 18:39:00 |                                       |
| ops27 | 2006 jul 12 18:39:01 | - | 2006 jul 17 22:25:00 |                                       |
| ops28 | 2006 jul 12 18:39:01 | - | 2006 sep 03 19:13:00 |                                       |
| ops28 | 2006 jul 12 18:39:01 | - | 2006 sep 03 19:13:00 |                                       |
| ops29 | 2006 sep 03 19:13:00 | - | 2006 oct 01 20:30:00 |                                       |
| ops30 | 2006 oct 01 20:30:00 | - | 2006 oct 06 21:34:00 |                                       |
| ops31 | 2006 oct 06 21:34:00 | - | 2006 oct 12 19:15:00 |                                       |
| ops32 | 2006 oct 12 19:15:00 | - | 2006 oct 24 18:45:00 |                                       |
| ops33 | 2006 oct 24 18:45:00 | - | 2006 nov 30 04:30:00 |                                       |
| ops34 | 2006 nov 30 04:30:00 | - | 2007 feb 22 21:05:00 |                                       |
| ops35 | 2007 feb 22 21:05:00 | - | 2007 mar 01 12:10:00 |                                       |
| ops36 | 2007 mar 01 12:10:00 | - | 2007 apr 03 19:38:30 |                                       |
| ops37 | 2007 apr 03 19:38:30 | - | 2007 may 19 19:30:00 |                                       |
| ops38 | 2007 may 20 01:30:00 | - | 2007 may 20 14:44:00 |                                       |
| ops39 | 2007 may 20 14:44:00 | - | 2007 may 21 6:57:00  | # extremely limited (only channels 20 |
| ops40 | 2007 may 21 6:57:00  | - | 2007 may 31 17:52:00 | # should be 2007 may 21 17:10:00 - 20 |
| ops41 | 2007 may 31 17:52:00 | - | 2007 may 31 19:36:30 |                                       |
| ops42 | 2007 may 31 19:36:30 | - | 2007 jun 14 19:56:30 |                                       |
| ops43 | 2007 jun 14 19:56:30 | - | 2007 aug 23 16:18:00 |                                       |
| ops44 | 2007 aug 23 16:18:00 | - | 2007 sep 26 21:16:00 |                                       |
| ops45 | 2007 sep 26 21:16:00 | - | 2008 aug 11 18:32:00 |                                       |
| ops46 | 2008 aug 11 18:32:00 | - | 2008 sep 30 18:02:00 |                                       |
| ops47 | 2008 sep 30 18:02:00 | - | 2008 oct 24 17:39:00 |                                       |
| ops48 | 2008 oct 24 17:39:00 | - | 2008 oct 31 22:08:30 |                                       |
| ops49 | 2008 oct 31 22:08:30 | - | 2009 jul 30 16:10:00 |                                       |
| ops50 | 2009 jul 30 16:10:00 | - | 2009 aug 04 16:44:00 |                                       |
| ops51 | 2009 aug 04 16:44:00 | - | 2009 sep 27 18:01:00 |                                       |
| ops52 | 2009 sep 27 18:01:00 | - | 2009 sep 27 19:50:00 |                                       |
| ops53 | 2009 sep 27 19:50:00 | - | 2009 nov 06 18:50:00 |                                       |
| ops54 | 2009 nov 06 18:50:00 | - | 2011 mar 17 00:50:00 |                                       |
| ops55 | 2011 mar 17 00:50:00 | - | 2011 oct 05 17:21:00 |                                       |
| ops56 | 2011 oct 05 17:21:00 | - | 2011 oct 21 19:55:30 |                                       |
| ops57 | 2011 oct 21 19:55:30 | - | 2011 nov 04 16:35:00 |                                       |
| ops58 | 2011 nov 04 16:35:00 | - | 2011 nov 14 16:00:00 |                                       |
| ops59 | 2011 nov 14 16:00:00 | - | 2012 oct 31 22:57:00 |                                       |
| ops60 | 2012 oct 31 22:57:00 | - | 2012 nov 8 22:58:00  |                                       |
| ops61 | 2012 nov 08 22:58:00 | - | 2012 dec 10 19:30:00 |                                       |
| ops62 | 2012 dec 10 19:30:00 | - | 2013 mar 28 18:53:00 |                                       |
| ops63 | 2013 mar 28 18:53:00 | - | 2013 may 07 17:45:00 |                                       |
| ops64 | 2013 may 07 17:45:00 | - | 2013 oct 08 21:57:00 | # removed h2o.li7200 from fast logger |
| ops66 | 2013 oct 08 21:57:00 | - | 2013 oct 24 19:57:00 | # added ec.155, removed t.med (note,  |
| ops67 | 2013 oct 24 19:57:00 | - | 2013 nov 07 17:59:00 | # added tc.med to the UC logger, char |

```
ops68    2013 nov 07 17:59:00 - 2014 apr 24 23:32:00    # added back 2-d ati sensor, renamed
ops69    2014 apr 24 23:32:00 - 2014 sep 26 19:32:00    # added three T.ir sensors to NCTC 1
ops70    2014 sep 26 19:32:00 - 2020 jan 01 16:00:00    # added co2/h2o from the LI-7500A (op
```

The directories included in the zip archive are (within each directory are the config files for that particular OPS configuration)):

Directories:

```
drwxr-xr-x 14 sburns aster 4096 Dec 8 2004 old_ops_files/
drwxr-xr-x 7 sburns aster 4096 May 22 2009 ops0A/
drwxr-xr-x 7 sburns aster 4096 Feb 18 2002 ops0.old/
drwxr-xr-x 2 sburns aster 4096 Feb 7 2011 ops1/
drwxr-xr-x 2 sburns aster 4096 Nov 19 2003 ops10/
drwxr-xr-x 2 sburns aster 4096 Jan 4 2004 ops11/
drwxr-xr-x 2 sburns aster 4096 May 10 2004 ops12/
drwxr-xr-x 2 sburns aster 4096 Sep 16 2004 ops13/
drwxr-xr-x 2 sburns aster 4096 Jun 4 2004 ops14/
drwxrwsr-x 7 sburns aster 4096 Feb 7 2011 ops1.4/
drwxr-xr-x 2 sburns aster 4096 Oct 4 2004 ops15/
drwxrwsr-x 8 sburns aster 4096 Jan 21 2011 ops1.5/
drwxr-xr-x 2 sburns aster 4096 Oct 10 2004 ops16/
drwxr-xr-x 2 sburns aster 4096 Oct 10 2004 ops17/
drwxr-xr-x 2 sburns aster 4096 Oct 10 2004 ops18/
drwxr-xr-x 2 sburns aster 4096 Nov 2 2004 ops19/
drwxrwsr-x 8 sburns aster 4096 May 6 2010 ops1_more_old_stuff/
drwxr-xr-x 2 sburns aster 4096 Nov 1 2004 ops1.old.ops1/
drwxrwsr-x 7 sburns aster 4096 Apr 25 2010 ops1.old.stuff/
drwxrwsr-x 7 sburns aster 4096 Feb 18 2002 ops1.soloris/
drwxr-xr-x 3 sburns aster 4096 Jan 21 2011 ops2/
drwxr-xr-x 2 sburns aster 4096 Nov 1 2004 ops20/
drwxrwxr-x 2 sburns aster 4096 Feb 11 2005 ops21/
drwxrwxr-x 2 sburns aster 4096 May 30 2005 ops22/
drwxrwxr-x 2 sburns aster 4096 Feb 11 2005 ops23/
drwxr-xr-x 2 sburns aster 4096 Jun 7 2005 ops24/
drwxr-xr-x 2 sburns aster 4096 Nov 15 2005 ops25/
drwxr-xr-x 2 sburns aster 4096 Oct 28 2005 ops25_old/
drwxr-xr-x 2 sburns aster 4096 Dec 20 2005 ops26/
drwxr-xr-x 2 sburns aster 4096 Jul 12 2006 ops27/
drwxr-xr-x 2 sburns aster 4096 Jul 10 2006 ops28/
drwxr-xr-x 2 sburns aster 4096 Jul 12 2006 ops29/
drwxr-xr-x 2 sburns aster 4096 Jul 12 2002 ops3/
drwxr-xr-x 2 sburns aster 4096 Oct 1 2006 ops30/
drwxr-xr-x 2 sburns aster 4096 Oct 6 2006 ops31/
drwxr-xr-x 2 sburns aster 4096 Oct 12 2006 ops32/
drwxr-xr-x 2 sburns aster 4096 Oct 26 2006 ops33/
```

|            |   |        |       |      |     |    |      |                    |
|------------|---|--------|-------|------|-----|----|------|--------------------|
| drwxr-xr-x | 2 | sburns | aster | 4096 | Nov | 30 | 2006 | ops34/             |
| drwxr-xr-x | 2 | sburns | aster | 4096 | Feb | 22 | 2007 | ops35/             |
| drwxr-xr-x | 2 | sburns | aster | 4096 | Nov | 30 | 2006 | ops36/             |
| drwxr-xr-x | 2 | sburns | aster | 4096 | Apr | 3  | 2007 | ops37/             |
| drwxr-xr-x | 2 | sburns | aster | 4096 | May | 19 | 2007 | ops38/             |
| drwxr-xr-x | 2 | sburns | aster | 4096 | May | 20 | 2007 | ops39/             |
| drwxr-xr-x | 2 | sburns | aster | 4096 | Dec | 3  | 2002 | ops4/              |
| drwxr-xr-x | 2 | sburns | aster | 4096 | Apr | 3  | 2007 | ops40/             |
| drwxr-xr-x | 2 | sburns | aster | 4096 | May | 31 | 2007 | ops41/             |
| drwxr-xr-x | 2 | sburns | aster | 4096 | Nov | 23 | 2007 | ops42/             |
| drwxr-xr-x | 2 | sburns | aster | 4096 | May | 31 | 2007 | ops42_old/         |
| drwxr-xr-x | 2 | sburns | aster | 4096 | Jun | 14 | 2007 | ops43/             |
| drwxrwxr-x | 2 | sburns | aster | 4096 | Aug | 23 | 2007 | ops44/             |
| drwxrwxr-x | 2 | sburns | aster | 4096 | Sep | 25 | 2007 | ops45/             |
| drwxr-xr-x | 2 | sburns | aster | 4096 | Aug | 11 | 2008 | ops46/             |
| drwxr-xr-x | 2 | sburns | aster | 4096 | Sep | 30 | 2008 | ops47/             |
| drwxr-xr-x | 2 | sburns | aster | 4096 | Oct | 24 | 2008 | ops48/             |
| drwxr-xr-x | 2 | sburns | aster | 4096 | Oct | 31 | 2008 | ops49/             |
| drwxr-xr-x | 2 | sburns | aster | 4096 | Dec | 3  | 2002 | ops5/              |
| drwxr-xr-x | 2 | sburns | aster | 4096 | Jul | 30 | 2009 | ops50/             |
| drwxr-xr-x | 2 | sburns | aster | 4096 | Aug | 4  | 2009 | ops51/             |
| drwxr-xr-x | 2 | sburns | aster | 4096 | Sep | 27 | 2009 | ops52/             |
| drwxr-xr-x | 2 | sburns | aster | 4096 | Sep | 27 | 2009 | ops53/             |
| drwxr-xr-x | 2 | sburns | aster | 4096 | Nov | 6  | 2009 | ops54/             |
| drwxr-xr-x | 2 | sburns | aster | 4096 | Mar | 16 | 2011 | ops55/             |
| drwxr-xr-x | 2 | sburns | aster | 4096 | Oct | 3  | 2011 | ops56/             |
| drwxr-xr-x | 2 | sburns | aster | 4096 | Oct | 21 | 2011 | ops57/             |
| drwxr-xr-x | 2 | sburns | aster | 4096 | Nov | 4  | 2011 | ops58/             |
| drwxr-xr-x | 2 | sburns | aster | 4096 | Nov | 15 | 2011 | ops59/             |
| drwxr-xr-x | 2 | sburns | aster | 4096 | Mar | 5  | 2003 | ops6/              |
| drwxr-xr-x | 2 | sburns | aster | 4096 | Oct | 31 | 2012 | ops60/             |
| drwxr-xr-x | 2 | sburns | aster | 4096 | Nov | 8  | 2012 | ops61/             |
| drwxr-xr-x | 2 | sburns | aster | 4096 | Dec | 10 | 2012 | ops62/             |
| drwxr-xr-x | 2 | sburns | aster | 4096 | Mar | 28 | 2013 | ops63/             |
| drwxr-xr-x | 2 | sburns | aster | 4096 | May | 7  | 2013 | ops64/             |
| drwxr-xr-x | 2 | sburns | aster | 4096 | Oct | 8  | 2013 | ops66/             |
| drwxr-xr-x | 2 | sburns | aster | 4096 | Oct | 24 | 2013 | ops67/             |
| drwxr-xr-x | 2 | sburns | aster | 4096 | Nov | 7  | 2013 | ops68/             |
| drwxr-xr-x | 2 | sburns | aster | 4096 | Apr | 24 | 2014 | ops69/             |
| drwxr-xr-x | 2 | sburns | aster | 4096 | Jun | 11 | 2003 | ops7/              |
| drwxr-xr-x | 2 | sburns | aster | 4096 | Sep | 26 | 2014 | ops70/             |
| drwxr-xr-x | 2 | sburns | aster | 4096 | Oct | 20 | 2003 | ops8/              |
| drwxr-xr-x | 2 | sburns | aster | 4096 | Oct | 20 | 2003 | ops9/              |
| drwxr-xr-x | 7 | sburns | aster | 4096 | May | 21 | 2009 | ops99_jul1/        |
| drwxr-xr-x | 7 | sburns | aster | 4096 | Jan | 26 | 2007 | ops_files_pre2002/ |
