# Supplementary material for: The Niwot Ridge Subalpine Forest US-NR1 AmeriFlux site – Part I: Data acquisition and site record-keeping
Source: Copernicus journal article supplement (doi:10.5194/gi-2016-17), 2016-06-14
Supplement: Supplementary file 10 [file gi-2016-17-supplement.zip]

***Supplemental File for “The Niwot Ridge Subalpine Forest US-NR1 AmeriFlux site – Part I: Data acquisition and site record-keeping”  
by S. P. Burns et al.***

**README for: USNR1\_webcalendar.zip**

**S. P. Burns et al.**

sean@ucar.edu

Date: May 12, 2016

This is an archive of the web calendar used at the Niwot Ridge US-NR1 AmeriFlux site. It is a duplicate of the HTML shown here:

<http://urquell.colorado.edu/calendar/>

to look at the calendar pages in the zip archive, open the files in a web browser such as:

firefox calendar/index.html

or,

firefox calendar/2004.html

or,

firefox calendar/2012.6.html

The files included are:

```
-rw-rw-r-- 1 beaurejm httpd 3804 Apr 25 2008 1998.10.html
-rw-rw-r-- 1 sburns httpd 4102 Feb 7 2011 1998.11.html
-rw-rw-r-- 1 sburns httpd 3562 Feb 11 2011 1998.12.html
-rw-rw-r-- 1 beaurejm httpd 2662 Jan 31 2007 1998.1.html
-rw-rw-r-- 1 beaurejm httpd 2539 Jan 31 2007 1998.2.html
-rw-rw-r-- 1 beaurejm httpd 2685 Jan 31 2007 1998.3.html
-rw-rw-r-- 1 beaurejm httpd 2681 Feb 16 2007 1998.4.html
-rw-rw-r-- 1 beaurejm httpd 3160 Jan 31 2007 1998.5.html
-rw-rw-r-- 1 beaurejm httpd 2852 Apr 25 2008 1998.6.html
-rw-rw-r-- 1 beaurejm httpd 2722 Jan 31 2007 1998.7.html
-rw-rw-r-- 1 beaurejm httpd 3102 Jan 31 2007 1998.8.html
-rw-rw-r-- 1 beaurejm httpd 2763 Jan 31 2007 1998.9.html

-rw-rw-r-- 1 beaurejm httpd 3637 Feb 19 2007 1999.10.html
-rw-rw-r-- 1 beaurejm httpd 2949 Feb 21 2007 1999.11.html
-rw-rw-r-- 1 sburns httpd 3259 Feb 11 2011 1999.12.html
-rw-rw-r-- 1 beaurejm httpd 4065 Apr 25 2008 1999.1.html
```

|            |   |          |       |      |     |    |       |              |
|------------|---|----------|-------|------|-----|----|-------|--------------|
| -rw-rw-r-- | 1 | sburns   | httpd | 2696 | Feb | 8  | 2011  | 1999.2.html  |
| -rw-rw-r-- | 1 | sburns   | httpd | 3383 | Feb | 8  | 2011  | 1999.3.html  |
| -rw-rw-r-- | 1 | sburns   | httpd | 3255 | Feb | 8  | 2011  | 1999.4.html  |
| -rw-rw-r-- | 1 | beaurejm | httpd | 3328 | Apr | 25 | 2008  | 1999.5.html  |
| -rw-rw-r-- | 1 | sburns   | httpd | 3761 | Feb | 11 | 2011  | 1999.6.html  |
| -rw-rw-r-- | 1 | sburns   | httpd | 4899 | Feb | 8  | 2011  | 1999.7.html  |
| -rw-rw-r-- | 1 | sburns   | httpd | 4397 | Jun | 7  | 2011  | 1999.8.html  |
| -rw-rw-r-- | 1 | beaurejm | httpd | 3637 | Apr | 28 | 2008  | 1999.9.html  |
|            |   |          |       |      |     |    |       |              |
| -rw-rw-r-- | 1 | beaurejm | httpd | 2769 | Jan | 30 | 2007  | 2000.10.html |
| -rw-rw-r-- | 1 | beaurejm | httpd | 2743 | Feb | 6  | 2007  | 2000.11.html |
| -rw-rw-r-- | 1 | sburns   | httpd | 3221 | Jan | 4  | 2011  | 2000.12.html |
| -rw-rw-r-- | 1 | sburns   | httpd | 3062 | Jan | 4  | 2011  | 2000.1.html  |
| -rw-rw-r-- | 1 | beaurejm | httpd | 2900 | Feb | 21 | 2007  | 2000.2.html  |
| -rw-rw-r-- | 1 | beaurejm | httpd | 3524 | Apr | 22 | 2008  | 2000.3.html  |
| -rw-rw-r-- | 1 | beaurejm | httpd | 3465 | Apr | 22 | 2008  | 2000.4.html  |
| -rw-rw-r-- | 1 | beaurejm | httpd | 2755 | Jan | 30 | 2007  | 2000.5.html  |
| -rw-rw-r-- | 1 | sburns   | httpd | 3051 | Feb | 3  | 2011  | 2000.6.html  |
| -rw-rw-r-- | 1 | beaurejm | httpd | 3127 | Jan | 30 | 2007  | 2000.7.html  |
| -rw-rw-r-- | 1 | beaurejm | httpd | 2696 | Jan | 30 | 2007  | 2000.8.html  |
| -rw-rw-r-- | 1 | sburns   | httpd | 2890 | Feb | 3  | 2011  | 2000.9.html  |
|            |   |          |       |      |     |    |       |              |
| -rw-rw-r-- | 1 | beaurejm | httpd | 2746 | Jan | 29 | 2007  | 2001.10.html |
| -rw-rw-r-- | 1 | beaurejm | httpd | 2743 | Feb | 6  | 2007  | 2001.11.html |
| -rw-rw-r-- | 1 | sburns   | httpd | 3171 | Jan | 4  | 2011  | 2001.12.html |
| -rw-rw-r-- | 1 | sburns   | httpd | 2657 | Jan | 4  | 2011  | 2001.1.html  |
| -rw-rw-r-- | 1 | beaurejm | httpd | 2964 | Jan | 26 | 2007  | 2001.2.html  |
| -rw-rw-r-- | 1 | beaurejm | httpd | 2689 | Jan | 26 | 2007  | 2001.3.html  |
| -rw-rw-r-- | 1 | beaurejm | httpd | 2682 | Jan | 26 | 2007  | 2001.4.html  |
| -rw-rw-r-- | 1 | beaurejm | httpd | 2756 | Jan | 26 | 2007  | 2001.5.html  |
| -rw-rw-r-- | 1 | sburns   | httpd | 2898 | Feb | 2  | 2011  | 2001.6.html  |
| -rw-rw-r-- | 1 | beaurejm | httpd | 2719 | Jan | 29 | 2007  | 2001.7.html  |
| -rw-rw-r-- | 1 | sburns   | httpd | 3000 | May | 12 | 14:15 | 2001.8.html  |
| -rw-rw-r-- | 1 | beaurejm | httpd | 3169 | Jan | 29 | 2007  | 2001.9.html  |
|            |   |          |       |      |     |    |       |              |
| -rw-rw-r-- | 1 | sburns   | httpd | 2750 | Jan | 8  | 2007  | 2002.10.html |
| -rw-rw-r-- | 1 | sburns   | httpd | 2746 | Jan | 8  | 2007  | 2002.11.html |
| -rw-rw-r-- | 1 | sburns   | httpd | 2714 | Jan | 8  | 2007  | 2002.12.html |
| -rw-rw-r-- | 1 | sburns   | httpd | 4251 | Jan | 4  | 2011  | 2002.1.html  |
| -rw-rw-r-- | 1 | sburns   | httpd | 4092 | Jan | 4  | 2011  | 2002.2.html  |
| -rw-rw-r-- | 1 | sburns   | httpd | 3745 | Jan | 24 | 2011  | 2002.3.html  |
| -rw-rw-r-- | 1 | beaurejm | httpd | 2681 | Jan | 22 | 2007  | 2002.4.html  |
| -rw-rw-r-- | 1 | sburns   | httpd | 3733 | Jan | 4  | 2011  | 2002.5.html  |
| -rw-rw-r-- | 1 | beaurejm | httpd | 3198 | Jan | 22 | 2007  | 2002.6.html  |
| -rw-rw-r-- | 1 | sburns   | httpd | 5832 | Jan | 5  | 2011  | 2002.7.html  |
| -rw-rw-r-- | 1 | sburns   | httpd | 6189 | Jul | 30 | 2013  | 2002.8.html  |
| -rw-rw-r-- | 1 | sburns   | httpd | 7563 | Jul | 30 | 2013  | 2002.9.html  |

|            |   |          |       |       |     |    |      |                |
|------------|---|----------|-------|-------|-----|----|------|----------------|
| -rw-rw-r-- | 1 | sburns   | httpd | 6484  | Jan | 10 | 2004 | 2003.10.html   |
| -rw-rw-r-- | 1 | sburns   | httpd | 6482  | Jan | 10 | 2004 | 2003.11.html   |
| -rw-rw-r-- | 1 | sburns   | httpd | 3982  | Oct | 23 | 2015 | 2003.12.html   |
| -rw-rw-r-- | 1 | sburns   | httpd | 2881  | Jan | 16 | 2011 | 2003.1.html    |
| -rw-rw-r-- | 1 | sburns   | httpd | 3682  | Jan | 3  | 2014 | 2003.2.html    |
| -rw-rw-r-- | 1 | sburns   | httpd | 4637  | Jun | 18 | 2010 | 2003.3.html    |
| -rw-rw-r-- | 1 | sburns   | httpd | 4799  | Jan | 11 | 2011 | 2003.4.html    |
| -rw-rw-r-- | 1 | sburns   | httpd | 5650  | Jan | 11 | 2011 | 2003.5.html    |
| -rw-rw-r-- | 1 | sburns   | httpd | 6687  | Jun | 17 | 2010 | 2003.6.html    |
| -rw-rw-r-- | 1 | sburns   | httpd | 6417  | Jun | 17 | 2010 | 2003.7.html    |
| -rw-rw-r-- | 1 | sburns   | httpd | 4859  | Mar | 20 | 2006 | 2003.8.html    |
| -rw-rw-r-- | 1 | sburns   | httpd | 6468  | Jun | 17 | 2010 | 2003.9.html    |
| -rw-rw-r-- | 1 | sburns   | httpd | 2069  | Dec | 12 | 2005 | 2003.html      |
|            |   |          |       |       |     |    |      |                |
| -rw-rw-r-- | 1 | sburns   | httpd | 11397 | Feb | 3  | 2006 | 2004.10.html   |
| -rw-rw-r-- | 1 | beaurejm | httpd | 6631  | Feb | 6  | 2007 | 2004.11.html   |
| -rw-rw-r-- | 1 | sburns   | httpd | 4890  | Dec | 29 | 2004 | 2004.12.html   |
| -rw-rw-r-- | 1 | sburns   | httpd | 4449  | May | 25 | 2005 | 2004.1.html    |
| -rw-rw-r-- | 1 | sburns   | httpd | 4844  | Mar | 4  | 2004 | 2004.2.html    |
| -rw-rw-r-- | 1 | sburns   | httpd | 5587  | May | 25 | 2005 | 2004.3.html    |
| -rw-rw-r-- | 1 | sburns   | httpd | 6016  | Jun | 5  | 2005 | 2004.4.html    |
| -rw-rw-r-- | 1 | sburns   | httpd | 7616  | May | 25 | 2005 | 2004.5.html    |
| -rw-rw-r-- | 1 | sburns   | httpd | 6535  | May | 25 | 2005 | 2004.6.html    |
| -rw-rw-r-- | 1 | sburns   | httpd | 7638  | Aug | 23 | 2006 | 2004.7.html    |
| -rw-rw-r-- | 1 | sburns   | httpd | 7153  | Aug | 23 | 2006 | 2004.8.html    |
| -rw-rw-r-- | 1 | sburns   | httpd | 5361  | Jan | 10 | 2011 | 2004.9.html    |
| -rw-rw-r-- | 1 | sburns   | httpd | 2069  | Dec | 12 | 2005 | 2004.html      |
| -rw-rw-r-- | 1 | sburns   | httpd | 799   | Feb | 23 | 2005 | 2004_old.html  |
|            |   |          |       |       |     |    |      |                |
| -rw-rw-r-- | 1 | sburns   | httpd | 11218 | Nov | 8  | 2005 | 2005.10.html   |
| -rw-rw-r-- | 1 | sburns   | httpd | 6043  | Jan | 5  | 2006 | 2005.11.html   |
| -rw-rw-r-- | 1 | sburns   | httpd | 5291  | Jan | 1  | 2006 | 2005.12.html   |
| -rw-rw-r-- | 1 | sburns   | httpd | 6242  | Apr | 29 | 2006 | 2005.1.html    |
| -rw-rw-r-- | 1 | sburns   | httpd | 6641  | May | 25 | 2005 | 2005.2.html    |
| -rw-rw-r-- | 1 | sburns   | httpd | 6798  | Aug | 31 | 2005 | 2005.3.html    |
| -rw-rw-r-- | 1 | sburns   | httpd | 5762  | Aug | 31 | 2005 | 2005.4.html    |
| -rw-rw-r-- | 1 | sburns   | httpd | 8239  | Jun | 20 | 2005 | 2005.5.html    |
| -rw-rw-r-- | 1 | sburns   | httpd | 8197  | Jul | 6  | 2005 | 2005.6.html    |
| -rw-rw-r-- | 1 | sburns   | httpd | 8620  | Aug | 10 | 2005 | 2005.7.html    |
| -rw-rw-r-- | 1 | sburns   | httpd | 7605  | Jan | 9  | 2008 | 2005.8.html    |
| -rw-rw-r-- | 1 | sburns   | httpd | 9087  | Jan | 10 | 2006 | 2005.9.html    |
| -rw-rw-r-- | 1 | sburns   | httpd | 2069  | Nov | 29 | 2005 | 2005.html      |
| -rw-rw-r-- | 1 | sburns   | httpd | 1579  | May | 17 | 2005 | 2005_orig.html |
|            |   |          |       |       |     |    |      |                |
| -rw-rw-r-- | 1 | sburns   | httpd | 8371  | Nov | 3  | 2006 | 2006.10.html   |
| -rw-rw-r-- | 1 | sburns   | httpd | 5470  | Nov | 30 | 2006 | 2006.11.html   |
| -rw-rw-r-- | 1 | beaurejm | httpd | 5789  | Jan | 31 | 2007 | 2006.12.html   |
| -rw-rw-r-- | 1 | sburns   | httpd | 6111  | Sep | 7  | 2006 | 2006.1.html    |

|            |   |          |       |       |     |    |       |              |
|------------|---|----------|-------|-------|-----|----|-------|--------------|
| -rw-rw-r-- | 1 | sburns   | httpd | 5117  | Sep | 7  | 2006  | 2006.2.html  |
| -rw-rw-r-- | 1 | sburns   | httpd | 5729  | Sep | 7  | 2006  | 2006.3.html  |
| -rw-rw-r-- | 1 | sburns   | httpd | 8385  | Jan | 21 | 2008  | 2006.4.html  |
| -rw-rw-r-- | 1 | sburns   | httpd | 8213  | Sep | 7  | 2006  | 2006.5.html  |
| -rw-rw-r-- | 1 | sburns   | httpd | 6092  | Feb | 26 | 2007  | 2006.6.html  |
| -rw-rw-r-- | 1 | sburns   | httpd | 10806 | Sep | 7  | 2006  | 2006.7.html  |
| -rw-rw-r-- | 1 | sburns   | httpd | 8218  | Sep | 7  | 2006  | 2006.8.html  |
| -rw-rw-r-- | 1 | sburns   | httpd | 9481  | Jan | 12 | 2007  | 2006.9.html  |
| -rw-rw-r-- | 1 | sburns   | httpd | 2069  | May | 6  | 2006  | 2006.html    |
|            |   |          |       |       |     |    |       |              |
| -rw-rw-r-- | 1 | sburns   | httpd | 9862  | Nov | 13 | 2007  | 2007.10.html |
| -rw-rw-r-- | 1 | sburns   | httpd | 8458  | Dec | 10 | 2007  | 2007.11.html |
| -rw-rw-r-- | 1 | sburns   | httpd | 8952  | Jan | 6  | 2008  | 2007.12.html |
| -rw-rw-r-- | 1 | sburns   | httpd | 5117  | Feb | 6  | 2007  | 2007.1.html  |
| -rw-rw-r-- | 1 | sburns   | httpd | 5256  | Mar | 6  | 2007  | 2007.2.html  |
| -rw-rw-r-- | 1 | sburns   | httpd | 5669  | Apr | 2  | 2007  | 2007.3.html  |
| -rw-rw-r-- | 1 | sburns   | httpd | 9157  | Feb | 18 | 11:04 | 2007.4.html  |
| -rw-rw-r-- | 1 | sburns   | httpd | 9348  | Dec | 11 | 2007  | 2007.5.html  |
| -rw-rw-r-- | 1 | sburns   | httpd | 9312  | Oct | 14 | 2007  | 2007.6.html  |
| -rw-rw-r-- | 1 | sburns   | httpd | 10220 | Nov | 23 | 2007  | 2007.7.html  |
| -rw-rw-r-- | 1 | beaurejm | httpd | 9364  | Feb | 28 | 2008  | 2007.8.html  |
| -rw-rw-r-- | 1 | sburns   | httpd | 11055 | Feb | 27 | 2008  | 2007.9.html  |
| -rw-rw-r-- | 1 | sburns   | httpd | 2069  | Jul | 2  | 2009  | 2007.html    |
|            |   |          |       |       |     |    |       |              |
| -rw-rw-r-- | 1 | beaurejm | httpd | 9904  | Nov | 4  | 2008  | 2008.10.html |
| -rw-rw-r-- | 1 | sburns   | httpd | 7012  | Oct | 6  | 2010  | 2008.11.html |
| -rw-rw-r-- | 1 | sburns   | httpd | 4394  | Jan | 6  | 2009  | 2008.12.html |
| -rw-rw-r-- | 1 | sburns   | httpd | 8141  | Mar | 16 | 2008  | 2008.1.html  |
| -rw-rw-r-- | 1 | sburns   | httpd | 7339  | Apr | 2  | 2008  | 2008.2.html  |
| -rw-rw-r-- | 1 | beaurejm | httpd | 6660  | Apr | 3  | 2008  | 2008.3.html  |
| -rw-rw-r-- | 1 | sburns   | httpd | 5062  | May | 9  | 2008  | 2008.4.html  |
| -rw-rw-r-- | 1 | beaurejm | httpd | 7071  | Jun | 9  | 2008  | 2008.5.html  |
| -rw-rw-r-- | 1 | sburns   | httpd | 8290  | Jul | 8  | 2008  | 2008.6.html  |
| -rw-rw-r-- | 1 | sburns   | httpd | 9470  | Aug | 1  | 2008  | 2008.7.html  |
| -rw-rw-r-- | 1 | beaurejm | httpd | 8814  | Oct | 13 | 2008  | 2008.8.html  |
| -rw-rw-r-- | 1 | sburns   | httpd | 7242  | Oct | 25 | 2010  | 2008.9.html  |
| -rw-rw-r-- | 1 | sburns   | httpd | 2069  | Jul | 2  | 2009  | 2008.html    |
|            |   |          |       |       |     |    |       |              |
| -rw-rw-r-- | 1 | sburns   | httpd | 7066  | Nov | 2  | 2009  | 2009.10.html |
| -rw-rw-r-- | 1 | sburns   | httpd | 5979  | Nov | 30 | 2009  | 2009.11.html |
| -rw-rw-r-- | 1 | sburns   | httpd | 5756  | Dec | 21 | 2009  | 2009.12.html |
| -rw-rw-r-- | 1 | sburns   | httpd | 5092  | Feb | 2  | 2009  | 2009.1.html  |
| -rw-rw-r-- | 1 | sburns   | httpd | 3244  | Feb | 17 | 2009  | 2009.2.html  |
| -rw-rw-r-- | 1 | sburns   | httpd | 5286  | Apr | 1  | 2009  | 2009.3.html  |
| -rw-rw-r-- | 1 | sburns   | httpd | 6035  | May | 3  | 2009  | 2009.4.html  |
| -rw-rw-r-- | 1 | sburns   | httpd | 8101  | Jun | 7  | 2009  | 2009.5.html  |
| -rw-rw-r-- | 1 | sburns   | httpd | 8217  | Sep | 23 | 2009  | 2009.6.html  |
| -rw-rw-r-- | 1 | sburns   | httpd | 9285  | Aug | 31 | 2009  | 2009.7.html  |

|            |   |        |       |      |     |    |      |              |
|------------|---|--------|-------|------|-----|----|------|--------------|
| -rw-rw-r-- | 1 | sburns | httpd | 7566 | May | 23 | 2014 | 2009.8.html  |
| -rw-rw-r-- | 1 | sburns | httpd | 7623 | Oct | 19 | 2009 | 2009.9.html  |
| -rw-rw-r-- | 1 | sburns | httpd | 2069 | Sep | 22 | 2014 | 2009.html    |
| -rw-rw-r-- | 1 | sburns | httpd | 3178 | Jan | 14 | 2005 | 200x.10.html |
| -rw-rw-r-- | 1 | sburns | httpd | 2743 | Jan | 14 | 2005 | 200x.11.html |
| -rw-rw-r-- | 1 | sburns | httpd | 2831 | Jan | 14 | 2005 | 200x.12.html |
| -rw-rw-r-- | 1 | sburns | httpd | 2653 | Nov | 29 | 2005 | 200x.1.html  |
| -rw-rw-r-- | 1 | sburns | httpd | 2996 | Jan | 14 | 2005 | 200x.2.html  |
| -rw-rw-r-- | 1 | sburns | httpd | 2687 | Jan | 14 | 2005 | 200x.3.html  |
| -rw-rw-r-- | 1 | sburns | httpd | 2681 | Jan | 14 | 2005 | 200x.4.html  |
| -rw-rw-r-- | 1 | sburns | httpd | 2753 | Jan | 14 | 2005 | 200x.5.html  |
| -rw-rw-r-- | 1 | sburns | httpd | 2793 | Jan | 14 | 2005 | 200x.6.html  |
| -rw-rw-r-- | 1 | sburns | httpd | 3127 | Jan | 14 | 2005 | 200x.7.html  |
| -rw-rw-r-- | 1 | sburns | httpd | 2695 | Jan | 14 | 2005 | 200x.8.html  |
| -rw-rw-r-- | 1 | sburns | httpd | 2741 | Jan | 14 | 2005 | 200x.9.html  |
| -rw-rw-r-- | 1 | sburns | httpd | 7196 | Oct | 29 | 2012 | 2010.10.html |
| -rw-rw-r-- | 1 | sburns | httpd | 5422 | Dec | 3  | 2010 | 2010.11.html |
| -rw-rw-r-- | 1 | sburns | httpd | 5868 | Jan | 7  | 2011 | 2010.12.html |
| -rw-rw-r-- | 1 | sburns | httpd | 5145 | Jan | 27 | 2010 | 2010.1.html  |
| -rw-rw-r-- | 1 | sburns | httpd | 4268 | Mar | 12 | 2010 | 2010.2.html  |
| -rw-rw-r-- | 1 | sburns | httpd | 5059 | Apr | 1  | 2010 | 2010.3.html  |
| -rw-rw-r-- | 1 | sburns | httpd | 5338 | Apr | 29 | 2010 | 2010.4.html  |
| -rw-rw-r-- | 1 | sburns | httpd | 7318 | Jun | 8  | 2010 | 2010.5.html  |
| -rw-rw-r-- | 1 | sburns | httpd | 5543 | Jul | 24 | 2010 | 2010.6.html  |
| -rw-rw-r-- | 1 | sburns | httpd | 6716 | Jul | 28 | 2010 | 2010.7.html  |
| -rw-rw-r-- | 1 | sburns | httpd | 4360 | Sep | 1  | 2010 | 2010.8.html  |
| -rw-rw-r-- | 1 | sburns | httpd | 8128 | Oct | 12 | 2010 | 2010.9.html  |
| -rw-rw-r-- | 1 | sburns | httpd | 2069 | Sep | 22 | 2014 | 2010.html    |
| -rw-rw-r-- | 1 | sburns | httpd | 8489 | Jan | 18 | 2012 | 2011.10.html |
| -rw-rw-r-- | 1 | sburns | httpd | 5478 | Dec | 4  | 2011 | 2011.11.html |
| -rw-rw-r-- | 1 | sburns | httpd | 4502 | Jan | 18 | 2012 | 2011.12.html |
| -rw-rw-r-- | 1 | sburns | httpd | 6419 | Feb | 4  | 2011 | 2011.1.html  |
| -rw-rw-r-- | 1 | sburns | httpd | 5306 | Mar | 3  | 2011 | 2011.2.html  |
| -rw-rw-r-- | 1 | sburns | httpd | 4682 | Mar | 31 | 2011 | 2011.3.html  |
| -rw-rw-r-- | 1 | sburns | httpd | 4626 | Apr | 21 | 2011 | 2011.4.html  |
| -rw-rw-r-- | 1 | sburns | httpd | 5162 | Jun | 5  | 2011 | 2011.5.html  |
| -rw-rw-r-- | 1 | sburns | httpd | 5566 | Jun | 28 | 2011 | 2011.6.html  |
| -rw-rw-r-- | 1 | sburns | httpd | 7709 | Aug | 22 | 2011 | 2011.7.html  |
| -rw-rw-r-- | 1 | sburns | httpd | 4734 | Sep | 5  | 2011 | 2011.8.html  |
| -rw-rw-r-- | 1 | sburns | httpd | 5584 | Oct | 3  | 2011 | 2011.9.html  |
| -rw-rw-r-- | 1 | sburns | httpd | 2069 | Sep | 22 | 2014 | 2011.html    |
| -rw-rw-r-- | 1 | sburns | httpd | 5840 | Nov | 5  | 2012 | 2012.10.html |
| -rw-rw-r-- | 1 | sburns | httpd | 5898 | Dec | 6  | 2012 | 2012.11.html |
| -rw-rw-r-- | 1 | sburns | httpd | 7499 | Feb | 28 | 2013 | 2012.12.html |

|            |   |        |       |      |     |    |       |              |
|------------|---|--------|-------|------|-----|----|-------|--------------|
| -rw-rw-r-- | 1 | sburns | httpd | 4471 | Feb | 5  | 2012  | 2012.1.html  |
| -rw-rw-r-- | 1 | sburns | httpd | 4141 | Feb | 14 | 2012  | 2012.2.html  |
| -rw-rw-r-- | 1 | sburns | httpd | 4519 | Mar | 30 | 2012  | 2012.3.html  |
| -rw-rw-r-- | 1 | sburns | httpd | 4206 | Apr | 26 | 2012  | 2012.4.html  |
| -rw-rw-r-- | 1 | sburns | httpd | 3707 | May | 25 | 2012  | 2012.5.html  |
| -rw-rw-r-- | 1 | sburns | httpd | 4532 | Jul | 1  | 2012  | 2012.6.html  |
| -rw-rw-r-- | 1 | sburns | httpd | 7253 | Sep | 7  | 2012  | 2012.7.html  |
| -rw-rw-r-- | 1 | sburns | httpd | 6864 | Aug | 31 | 2012  | 2012.8.html  |
| -rw-rw-r-- | 1 | sburns | httpd | 6747 | Oct | 11 | 2012  | 2012.9.html  |
| -rw-rw-r-- | 1 | sburns | httpd | 2069 | Sep | 22 | 2014  | 2012.html    |
|            |   |        |       |      |     |    |       |              |
| -rw-rw-r-- | 1 | sburns | httpd | 7270 | Feb | 24 | 2014  | 2013.10.html |
| -rw-rw-r-- | 1 | sburns | httpd | 7415 | Nov | 30 | 2013  | 2013.11.html |
| -rw-rw-r-- | 1 | sburns | httpd | 4826 | Feb | 7  | 2014  | 2013.12.html |
| -rw-rw-r-- | 1 | sburns | httpd | 4255 | Jan | 24 | 2013  | 2013.1.html  |
| -rw-rw-r-- | 1 | sburns | httpd | 4559 | Mar | 6  | 2014  | 2013.2.html  |
| -rw-rw-r-- | 1 | sburns | httpd | 4852 | Apr | 2  | 2013  | 2013.3.html  |
| -rw-rw-r-- | 1 | sburns | httpd | 4473 | May | 3  | 2013  | 2013.4.html  |
| -rw-rw-r-- | 1 | sburns | httpd | 5201 | May | 30 | 2013  | 2013.5.html  |
| -rw-rw-r-- | 1 | sburns | httpd | 6776 | Nov | 28 | 2014  | 2013.6.html  |
| -rw-rw-r-- | 1 | sburns | httpd | 8152 | May | 6  | 2015  | 2013.7.html  |
| -rw-rw-r-- | 1 | sburns | httpd | 4669 | Aug | 28 | 2013  | 2013.8.html  |
| -rw-rw-r-- | 1 | sburns | httpd | 7590 | Oct | 10 | 2013  | 2013.9.html  |
| -rw-rw-r-- | 1 | sburns | httpd | 2069 | Sep | 22 | 2014  | 2013.html    |
|            |   |        |       |      |     |    |       |              |
| -rw-rw-r-- | 1 | sburns | httpd | 9815 | Jan | 7  | 10:17 | 2014.10.html |
| -rw-rw-r-- | 1 | sburns | httpd | 7327 | Dec | 10 | 16:40 | 2014.11.html |
| -rw-rw-r-- | 1 | sburns | httpd | 5784 | Feb | 8  | 12:42 | 2014.12.html |
| -rw-rw-r-- | 1 | sburns | httpd | 6062 | Feb | 13 | 2014  | 2014.1.html  |
| -rw-rw-r-- | 1 | sburns | httpd | 6395 | Mar | 6  | 2014  | 2014.2.html  |
| -rw-rw-r-- | 1 | sburns | httpd | 5733 | Apr | 9  | 2014  | 2014.3.html  |
| -rw-rw-r-- | 1 | sburns | httpd | 5874 | Sep | 5  | 2014  | 2014.4.html  |
| -rw-rw-r-- | 1 | sburns | httpd | 5594 | Sep | 5  | 2014  | 2014.5.html  |
| -rw-rw-r-- | 1 | sburns | httpd | 8142 | Jul | 4  | 2014  | 2014.6.html  |
| -rw-rw-r-- | 1 | sburns | httpd | 8815 | Aug | 4  | 2014  | 2014.7.html  |
| -rw-rw-r-- | 1 | sburns | httpd | 9688 | Oct | 29 | 2015  | 2014.8.html  |
| -rw-rw-r-- | 1 | sburns | httpd | 8520 | Oct | 10 | 2014  | 2014.9.html  |
| -rw-rw-r-- | 1 | sburns | httpd | 2081 | Sep | 22 | 2014  | 2014.html    |
|            |   |        |       |      |     |    |       |              |
| -rw-rw-r-- | 1 | sburns | httpd | 7061 | Nov | 5  | 2015  | 2015.10.html |
| -rw-rw-r-- | 1 | sburns | httpd | 6755 | Dec | 16 | 13:08 | 2015.11.html |
| -rw-rw-r-- | 1 | sburns | httpd | 5341 | Dec | 19 | 00:09 | 2015.12.html |
| -rw-rw-r-- | 1 | sburns | httpd | 5370 | May | 20 | 2015  | 2015.1.html  |
| -rw-rw-r-- | 1 | sburns | httpd | 5129 | May | 20 | 2015  | 2015.2.html  |
| -rw-rw-r-- | 1 | sburns | httpd | 4463 | Jan | 7  | 10:18 | 2015.3.html  |
| -rw-rw-r-- | 1 | sburns | httpd | 5997 | Jun | 15 | 2015  | 2015.4.html  |
| -rw-rw-r-- | 1 | sburns | httpd | 6738 | Jun | 15 | 2015  | 2015.5.html  |
| -rw-rw-r-- | 1 | sburns | httpd | 6406 | Nov | 12 | 12:56 | 2015.6.html  |

```

-rw-rw-r-- 1 sburns  httpd  6733 Nov 12 12:57 2015.7.html
-rw-rw-r-- 1 sburns  httpd  9908 Sep  8  2015 2015.8.html
-rw-rw-r-- 1 sburns  httpd  6456 Oct 19  2015 2015.9.html
-rw-rw-r-- 1 sburns  httpd  2081 Nov 10  2015 2015.html

-rw-rw-r-- 1 sburns  httpd  3153 Dec 30 15:17 2016.10.html
-rw-rw-r-- 1 sburns  httpd  2786 Dec 30 16:05 2016.11.html
-rw-rw-r-- 1 sburns  httpd  2900 Dec 30 16:10 2016.12.html
-rw-rw-r-- 1 sburns  httpd  4950 Feb  5 16:24 2016.1.html
-rw-rw-r-- 1 sburns  httpd  3949 Mar 11 23:21 2016.2.html
-rw-rw-r-- 1 sburns  httpd  4478 Apr  1 22:32 2016.3.html
-rw-rw-r-- 1 sburns  httpd  4426 Apr 29 12:30 2016.4.html
-rw-rw-r-- 1 sburns  httpd  2884 May 10 12:53 2016.5.html
-rw-rw-r-- 1 sburns  httpd  2978 Dec 30 14:56 2016.6.html
-rw-rw-r-- 1 sburns  httpd  2956 Feb  5 14:55 2016.7.html
-rw-rw-r-- 1 sburns  httpd  3323 Dec 30 15:00 2016.8.html
-rw-rw-r-- 1 sburns  httpd  2958 May  7 22:25 2016.9.html

-rw-rw-r-- 1 sburns  httpd  6062 Feb 13  2014 2020.1.html

-rw-rw-r-- 1 sburns  httpd  2694 Mar 23  2014 2025.10.html
-rw-rw-r-- 1 sburns  httpd  3140 Mar 23  2014 2025.11.html
-rw-rw-r-- 1 sburns  httpd  2682 Mar 23  2014 2025.12.html
-rw-rw-r-- 1 sburns  httpd  6062 Mar 23  2014 2025.1.html
-rw-rw-r-- 1 sburns  httpd  2741 Jan  3  2014 2025.5.html
-rw-rw-r-- 1 sburns  httpd  2787 Mar 23  2014 2025.6.html
-rw-rw-r-- 1 sburns  httpd  2715 Mar 23  2014 2025.7.html
-rw-rw-r-- 1 sburns  httpd  2692 Mar 23  2014 2025.8.html
-rw-rw-r-- 1 sburns  httpd  2724 Mar 23  2014 2025.9.html
lrwxrwxrwx 1 sburns  httpd      11 Apr  4 15:07 index.html -> 2016.4.html

```
