# Supplementary material for: The Niwot Ridge Subalpine Forest US-NR1 AmeriFlux site – Part I: Data acquisition and site record-keeping
Source: Copernicus journal article supplement (doi:10.5194/gi-2016-17), 2016-06-14
Supplement: Supplementary file 11 [file gi-2016-17-supplement.zip]

# ***Supplemental File for “The Niwot Ridge Subalpine Forest US-NR1 AmeriFlux site – Part I: Data acquisition and site record-keeping”***

***by S. P. Burns et al.***

## **README for: USNR1\_webphoto.zip**

**S. P. Burns et al.**

sean@ucar.edu

Date: May 12, 2016

This is an archive of the HTML files used for displaying photos from the Niwot Ridge US-NR1 AmeriFlux site. These HTML files are links in the webcalendar which can be found here:

<http://urquell.colorado.edu/calendar/>

There are over 650 files, and the format of the file uses the year, month, and day in the format, photos\_YYMMDD.html, such as:

```
-rw-r--r-- 1 sburns httpd 3663 Dec 31 12:41 photos_010830.html
-rw-r--r-- 1 sburns httpd 2023 Jul 30 2013 photos_020729.html
-rw-r--r-- 1 sburns httpd 3197 Jul 30 2013 photos_020813.html
-rw-r--r-- 1 sburns httpd 2178 Jul 30 2013 photos_020819.html
-rw-r--r-- 1 sburns httpd 1956 Jul 30 2013 photos_020820.html
-rw-r--r-- 1 sburns httpd 1725 Jul 30 2013 photos_020910.html
-rw-r--r-- 1 sburns httpd 3056 Jul 30 2013 photos_020916.html
-rw-r--r-- 1 sburns httpd 2939 Jul 30 2013 photos_020930.html
-rw-rw-r-- 1 sburns httpd 3008 Aug 21 2012 photos_030410.html
...etc, etc.
-rw-rw-r-- 1 sburns httpd 1319 Jan 27 13:14 photos_160118.html
-rw-rw-r-- 1 sburns httpd 1513 Jan 29 17:06 photos_160129.html
-rw-rw-r-- 1 sburns httpd 2377 Feb 18 07:00 photos_160217.html
-rw-rw-r-- 1 sburns httpd 3027 Mar 11 23:13 photos_160311.html
-rw-rw-r-- 1 sburns httpd 2958 Apr 1 21:53 photos_160401.html
-rw-rw-r-- 1 sburns httpd 3618 Apr 21 21:00 photos_160421.html
```

There is also HTML for showing of the photos for each year which are:

```
-rw-r--r-- 1 sburns httpd 3663 Dec 31 12:41 photos_2001.html
-rw-r--r-- 1 sburns httpd 14073 Dec 19 03:00 photos_2002.html
```

```

-rw-rw-r-- 1 sburns httpd 79700 May 30 2012 photos_2003.html
-rw-rw-r-- 1 sburns httpd 57065 May 30 2012 photos_2004a.html
-rw-rw-r-- 1 sburns httpd 63983 May 30 2012 photos_2004b.html
-rw-rw-r-- 1 sburns httpd 54180 May 30 2012 photos_2004c.html
-rw-rw-r-- 1 sburns httpd 173743 Dec 31 12:24 photos_2004.html
-rw-rw-r-- 1 sburns httpd 59101 May 30 2012 photos_2005a.html
-rw-rw-r-- 1 sburns httpd 50176 May 30 2012 photos_2005b.html
-rw-rw-r-- 1 sburns httpd 49169 May 30 2012 photos_2005c.html
-rw-rw-r-- 1 sburns httpd 156903 Dec 31 12:27 photos_2005.html
-rw-rw-r-- 1 sburns httpd 48669 May 30 2012 photos_2006a.html
-rw-rw-r-- 1 sburns httpd 48795 May 30 2012 photos_2006b.html
-rw-rw-r-- 1 sburns httpd 23676 May 30 2012 photos_2006c.html
-rw-rw-r-- 1 sburns httpd 119638 Dec 31 12:29 photos_2006.html
-rw-rw-r-- 1 sburns httpd 48883 May 30 2012 photos_2007a.html
-rw-rw-r-- 1 sburns httpd 30154 May 30 2012 photos_2007b.html
-rw-rw-r-- 1 sburns httpd 78284 Dec 31 12:30 photos_2007.html
-rw-rw-r-- 1 sburns httpd 33247 Apr 25 2012 photos_2008a.html
-rw-rw-r-- 1 sburns httpd 29210 Apr 25 2012 photos_2008b.html
-rw-rw-r-- 1 sburns httpd 61702 Dec 31 12:34 photos_2008.html
-rw-r--r-- 1 sburns httpd 38960 Apr 25 2012 photos_2009a.html
-rw-r--r-- 1 sburns httpd 42318 Apr 25 2012 photos_2009b.html
-rw-r--r-- 1 sburns httpd 80527 May 30 2012 photos_2009.html
-rw-r--r-- 1 sburns httpd 63214 Sep 10 2011 photos_2010.html
-rw-r--r-- 1 sburns httpd 62218 Mar 26 2014 photos_2011.html
-rw-r--r-- 1 sburns httpd 53276 Feb 22 2013 photos_2012.html
-rw-r--r-- 1 sburns httpd 70475 Oct 8 2014 photos_2013.html
-rw-r--r-- 1 sburns httpd 82703 Jan 8 2015 photos_2014.html
-rw-r--r-- 1 sburns httpd 64898 Dec 21 14:54 photos_2015.html

```

Finally, there are some HTML files that show photos related to some particular thing. These are:

```

-rw-r--r-- 1 sburns httpd 24306 Dec 31 14:44 photos_cme04_jielun.html
-rw-rw-r-- 1 sburns httpd 1952 Aug 22 2012 photos_examples.html
-rw-rw-r-- 1 sburns httpd 6786 Aug 22 2012 photos_hydra_inlets.html
-rw-rw-r-- 1 sburns httpd 28190 Aug 22 2012 photos_hydra_snow.html
-rw-rw-r-- 1 sburns httpd 35984 Aug 22 2012 photos_hydra_winter04.html
-rw-rw-r-- 1 sburns httpd 13259 Feb 29 14:22 photos_niwot_people.html
-rw-rw-r-- 1 sburns httpd 35462 Aug 22 2012 photos_pheno.html
-rw-rw-r-- 1 sburns httpd 2031 Jan 5 22:16 photos_russ.html
-rw-rw-r-- 1 sburns httpd 1878 Mar 7 2014 photos_tower.html

```
