# Supplementary material for: The Niwot Ridge Subalpine Forest US-NR1 AmeriFlux site – Part I: Data acquisition and site record-keeping
Source: Copernicus journal article supplement (doi:10.5194/gi-2016-17), 2016-06-14
Supplement: Supplementary file 12 [file gi-2016-17-supplement.zip]

# ***Supplemental File for “The Niwot Ridge Subalpine Forest US-NR1 AmeriFlux site – Part I: Data acquisition and site record-keeping”***

***by S. P. Burns et al.***

## **README for: USNR1\_nidas\_urquell.zip**

**S. P. Burns et al.**

sean@ucar.edu

Date: May 16, 2016

This is an archive of the NIDAS configuration files installed on the linux PC urquell (linux, 2.6.18-409.el5PAE). The compiled binaries for NIDAS can be found in the archive, USNR1\_prep.zip. Additional information is in README\_USNR1\_prep.pdf. The files included here are those within the NIDAS directory tree (/usr/local/aster/projects/NIWOT/ISFF/):

```
drwxr-xr-x  3 sburns  aster  4096 Apr  2  2015 cal_files/
drwxr-xr-x  4 sburns  aster  4096 May 13 09:50 cockpit/
drwxrwxr-x 19 sburns  aster  4096 Dec 17 11:42 config/
drwxrwxr-x  3 maclean aster  4096 Feb  9  2015 logs/
drwxr-xr-x  2 sburns  aster 36864 May 15 18:05 netcdf/
drwxr-xr-x  2 sburns  aster  4096 Nov 18  2014 netcdf_hr/
lrwxrwxrwx  1 maclean aster    26 Mar 31  2014 raw_data/
drwxrwxr-x  3 sburns  aster  4096 Oct 30  2015 scripts/
```

In order to run cockpit correctly, the appropriate qtjambi files,

```
-rw-rw-r-- 21705452 Jan  7  2014 qtjambi-linux32-gcc-4.5.0_01.jar
-rw-rw-r-- 22162196 Jan  7  2014 qtjambi-linux64-gcc-4.5.0_01.jar
```

need to be added to the directory:

/usr/local/aster/projects/NIWOT/ISFF/cockpit/lib/linux/

More information about qtjambi is available here:

[https://doc.qt.io/archives/qtjambi-4.5.2\\_01/com/trolltech/qt/qtjambi-index.html](https://doc.qt.io/archives/qtjambi-4.5.2_01/com/trolltech/qt/qtjambi-index.html)
