# Supplementary material for: The Niwot Ridge Subalpine Forest US-NR1 AmeriFlux site – Part I: Data acquisition and site record-keeping
Source: Copernicus journal article supplement (doi:10.5194/gi-2016-17), 2016-06-14
Supplement: Supplementary file 13 [file gi-2016-17-supplement.zip]

# ***Supplemental File for “The Niwot Ridge Subalpine Forest US-NR1 AmeriFlux site – Part I: Data acquisition and site record-keeping”***

**by S. P. Burns et al.**

## **README for: USNR1\_nidas\_isffa.zip**

**S. P. Burns et al.**

sean@ucar.edu

Date: May 15, 2016

This is an archive of the NIDAS software used on the Eurotech PC/104 Titan computer at the Niwot Ridge US-NR1 AmeriFlux site. The files included are:

```
-rw-r--r--  1 sburns      7441920 May 13 07:37 isffa_usr_local_160513.tar
-rw-r--r--  1 sburns          3858 Oct 20  2014 ntp.conf.isffa
-rw-r--r--  1 sburns          2050 Jan 12  2015 ptpd2.conf.isffa
-rwxr-xr-x  1 sburns          2217 Jan  9  2015 etc_init.d_isffa_160513*
```

A full listing of the files in isffa\_usr\_local\_160513.tar is:

```
drwxr-xr-x root/root          0 2015-12-01 14:21:02 local/
drwxr-xr-x root/root          0 2013-07-30 11:09:52 local/dpkg_versions/
drwxr-xr-x root/root          0 1999-12-31 17:15:26 local/dpkg_versions/titan/
-rw-r--r-- root/root          99 2013-07-30 11:09:52 local/dpkg_versions/eol-dpkg-scripts_1.0_all.ver
drwxr-xr-x root/root          0 2013-08-19 10:05:52 local/dpkg_versions/isfs/
-rw-r--r-- root/root        102 2013-08-19 10:05:52 local/dpkg_versions/isfs/isff-nidas_1.0_arm.ver
-rw-r--r-- root/root          97 2013-06-26 16:37:53 local/dpkg_versions/isfs/isff-scripts_1.0_all.ver
drwxr-xr-x root/root          0 2013-08-19 18:20:00 local/dpkg_versions/isfs/titan/
-rw-r--r-- root/root        103 2013-08-19 18:20:00 local/dpkg_versions/isfs/titan/diamond_1.1_arm.ver
-rw-r--r-- root/root        107 2013-04-11 14:38:28 local/dpkg_versions/isfs/dyndns-inadyn_1.96.2_arm.v
-rw-r--r-- root/root      653312 2015-12-01 14:20:41 local/isff_titan_151201.tar
drwxr-xr-x root/root          0 2015-01-09 15:43:00 local/bin/
-rwxrwxr-x root/root       18480 2015-01-09 15:43:00 local/bin/ck_xml
-rwxrwxr-x root/root        6048 2013-06-26 16:38:13 local/bin/tee_tty
-rwxrwxr-x root/root       22604 2015-01-09 15:43:00 local/bin/ir104
-rwxrwxr-x root/root       60152 2015-01-09 15:43:00 local/bin/data_dump
-rwxrwxr-x root/root       60248 2015-01-09 15:43:00 local/bin/data_stats
-rwxrwxr-x root/root       39932 2013-04-11 14:38:28 local/bin/inadyn
-rwxrwxr-x root/root       10120 2015-01-09 15:43:00 local/bin/ck_goes
-rwxrwxr-x root/root       11452 2015-01-09 15:43:01 local/bin/dsm
-rwxrwxr-x root/root       71308 2013-06-26 16:38:13 local/bin/garmin
-rwxrwxr-x root/root     111764 2015-01-09 15:43:00 local/bin/statsproc
-rwxrwxr-x root/root       34882 2013-06-26 16:38:13 local/bin/gps_nmea_sysclock
-rwxrwxr-x root/root        8700 2015-01-09 15:43:00 local/bin/viper_dio
-rwxrwxr-x root/root       52032 2015-01-09 15:43:00 local/bin/sing
-rwxrwxr-x root/root        8748 2013-04-11 14:38:28 local/bin/host
-rwxrwxr-x root/root       48204 2015-01-09 15:43:00 local/bin/rserial
drwxr-xr-x root/root          0 2015-01-09 15:43:11 local/scripts/
```

|            |           |       |            |          |                                                     |
|------------|-----------|-------|------------|----------|-----------------------------------------------------|
| -rwxrwxr-x | root/root | 129   | 2013-04-11 | 14:38:28 | local/scripts/enable_inadyn                         |
| -rwxrwxr-x | root/root | 41    | 2013-04-11 | 14:38:28 | local/scripts/disable_inadyn                        |
| -rwxr-xr-x | root/root | 1058  | 2015-01-09 | 15:43:11 | local/scripts/irqs                                  |
| -rwxr-xr-x | root/root | 1630  | 1999-12-31 | 17:16:07 | local/scripts/blue_check.sh                         |
| -rwxr-xr-x | root/root | 3171  | 2015-01-09 | 15:43:11 | local/scripts/net_check.sh                          |
| -rwxr-xr-x | root/root | 1537  | 2015-01-09 | 15:43:11 | local/scripts/tusb                                  |
| -rwxr-xr-x | root/root | 776   | 2015-01-09 | 15:43:11 | local/scripts/cktty                                 |
| -rwxr-xr-x | root/root | 5535  | 2015-01-09 | 15:43:11 | local/scripts/tio                                   |
| -rwxr-xr-x | root/root | 2947  | 2015-01-09 | 15:43:11 | local/scripts/router_check.sh                       |
| -rwxr-xrwx | root/root | 23548 | 2015-01-09 | 15:43:11 | local/scripts/dpkg_install_funcs.sh                 |
| drwxr-xr-x | root/root | 0     | 2015-01-09 | 15:43:11 | local/isff/                                         |
| drwxr-xr-x | root/root | 0     | 2013-11-05 | 12:33:55 | local/isff/projects/                                |
| drwxr-xr-x | root/root | 0     | 2014-07-29 | 12:50:19 | local/isff/projects/NIWOT/                          |
| drwxrwxr-x | root/root | 0     | 2014-06-26 | 11:01:13 | local/isff/projects/NIWOT/ISFF/                     |
| drwxrwxr-x | root/root | 0     | 2015-11-02 | 16:19:36 | local/isff/projects/NIWOT/ISFF/config/              |
| drwxr-xr-x | root/root | 0     | 2014-11-05 | 13:36:34 | local/isff/projects/NIWOT/ISFF/config/files_old.xml |
| -rw-r--r-- | root/root | 6614  | 2014-03-31 | 15:22:24 | local/isff/projects/NIWOT/ISFF/config/files_old.xml |
| -rw-r--r-- | root/root | 6739  | 2014-04-04 | 13:13:40 | local/isff/projects/NIWOT/ISFF/config/files_old.xml |
| -rw-r--r-- | root/root | 20686 | 2014-10-16 | 14:02:16 | local/isff/projects/NIWOT/ISFF/config/files_old.xml |
| -rw-r--r-- | root/root | 6729  | 2014-04-01 | 22:15:10 | local/isff/projects/NIWOT/ISFF/config/files_old.xml |
| -rw-r--r-- | root/root | 18618 | 2014-08-07 | 16:20:58 | local/isff/projects/NIWOT/ISFF/config/files_old.xml |
| -rw-rw-rw- | root/root | 19105 | 2014-10-12 | 20:25:28 | local/isff/projects/NIWOT/ISFF/config/files_old.xml |
| -rw-r--r-- | root/root | 8191  | 2014-08-07 | 15:58:30 | local/isff/projects/NIWOT/ISFF/config/files_old.xml |
| -rw-r--r-- | root/root | 4617  | 2014-03-25 | 17:28:30 | local/isff/projects/NIWOT/ISFF/config/files_old.xml |
| -rw-rw-rw- | root/root | 18979 | 2014-09-12 | 12:19:50 | local/isff/projects/NIWOT/ISFF/config/files_old.xml |
| -rw-rw-rw- | root/root | 21552 | 2014-10-14 | 15:03:46 | local/isff/projects/NIWOT/ISFF/config/files_old.xml |
| -rw-r--r-- | root/root | 24526 | 2014-10-17 | 15:05:08 | local/isff/projects/NIWOT/ISFF/config/files_old.xml |
| -rw-r--r-- | root/root | 6609  | 2014-03-26 | 11:16:01 | local/isff/projects/NIWOT/ISFF/config/files_old.xml |
| -rw-r--r-- | root/root | 29081 | 2014-11-06 | 14:04:36 | local/isff/projects/NIWOT/ISFF/config/niwot_ops72.x |
| -rw-r--r-- | root/root | 28856 | 2015-11-02 | 16:19:19 | local/isff/projects/NIWOT/ISFF/config/niwot.xml     |
| -rw-r--r-- | root/root | 29105 | 2015-01-09 | 15:47:33 | local/isff/projects/NIWOT/ISFF/config/niwot_ops73_m |
| -rw-r--r-- | root/root | 29272 | 2015-06-24 | 12:00:52 | local/isff/projects/NIWOT/ISFF/config/niwot_ops77.x |
| -rw-r--r-- | root/root | 24526 | 2014-10-17 | 15:05:08 | local/isff/projects/NIWOT/ISFF/config/niwot_ops70.x |
| -rw-r--r-- | root/root | 27841 | 2014-10-30 | 14:31:50 | local/isff/projects/NIWOT/ISFF/config/niwot_ops71.x |
| -rw-r--r-- | root/root | 28907 | 2015-08-06 | 09:38:40 | local/isff/projects/NIWOT/ISFF/config/niwot_ops80.x |
| -rw-r--r-- | root/root | 28856 | 2015-11-02 | 16:19:19 | local/isff/projects/NIWOT/ISFF/config/niwot_ops86.x |
| -rw-r--r-- | root/root | 28907 | 2015-07-21 | 15:44:58 | local/isff/projects/NIWOT/ISFF/config/niwot_ops79.x |
| -rw-r--r-- | root/root | 28877 | 2015-05-01 | 15:45:23 | local/isff/projects/NIWOT/ISFF/config/niwot_ops76.x |
| -rw-r--r-- | root/root | 28986 | 2015-10-13 | 15:17:02 | local/isff/projects/NIWOT/ISFF/config/niwot_ops85.x |
| -rw-r--r-- | root/root | 30720 | 2015-10-19 | 10:11:43 | local/isff/projects/NIWOT/ISFF/config/temp.tar      |
| -rw-r--r-- | root/root | 28838 | 2015-09-04 | 14:52:18 | local/isff/projects/NIWOT/ISFF/config/niwot_ops82.x |
| -rw-r--r-- | root/root | 28759 | 2015-08-14 | 11:44:46 | local/isff/projects/NIWOT/ISFF/config/niwot_ops81.x |
| drwxrwxr-x | root/root | 0     | 2014-07-28 | 16:52:07 | local/isff/projects/NIWOT/ISFF/scripts/             |
| drwxrwxr-x | root/root | 0     | 2014-08-07 | 16:01:39 | local/isff/projects/NIWOT/ISFF/scripts/dsm/         |
| -rwxr-xr-x | root/root | 318   | 2014-03-19 | 17:05:35 | local/isff/projects/NIWOT/ISFF/scripts/dsm/dsm_env. |
| drwxr-xr-x | root/root | 0     | 2015-01-09 | 15:43:12 | local/isff/scripts/                                 |
| -rwxr-xr-x | root/root | 937   | 2015-01-09 | 15:43:12 | local/isff/scripts/ir                               |
| -rwxr-xr-x | root/root | 2181  | 2015-01-09 | 15:43:12 | local/isff/scripts/mote_dump                        |
| -rwxr-xr-x | root/root | 750   | 2015-01-09 | 15:43:12 | local/isff/scripts/eio                              |
| -rwxr-xr-x | root/root | 2692  | 2015-01-09 | 15:43:11 | local/isff/scripts/swupdate                         |
| -rwxr-xr-x | root/root | 9978  | 2015-01-09 | 15:43:11 | local/isff/scripts/swinstall                        |
| -rwxr-xr-x | root/root | 26    | 2015-01-09 | 15:43:11 | local/isff/scripts/psd                              |
| -rwxr-xr-x | root/root | 6374  | 2015-01-09 | 15:43:12 | local/isff/scripts/project_update_funcs.sh          |
| -rwxr-xr-x | root/root | 1254  | 2015-01-09 | 15:43:11 | local/isff/scripts/st                               |
| -rwxr-xr-x | root/root | 20    | 2015-01-09 | 15:43:12 | local/isff/scripts/ddn                              |
| -rwxr-xr-x | root/root | 1973  | 2015-01-09 | 15:43:12 | local/isff/scripts/pjupdate                         |
| -rwxr-xr-x | root/root | 69    | 2015-01-09 | 15:43:12 | local/isff/scripts/dup                              |
| -rwxr-xr-x | root/root | 853   | 2015-01-09 | 15:43:11 | local/isff/scripts/vio                              |
| -rwxr-xr-x | root/root | 380   | 2015-01-09 | 15:43:11 | local/isff/scripts/stop_dsm                         |
| -rwxr-xr-x | root/root | 112   | 2015-01-09 | 15:43:12 | local/isff/scripts/lsu                              |
| -rwxr-xr-x | root/root | 280   | 2015-01-09 | 15:43:12 | local/isff/scripts/power_cycle_port                 |
| -rwxr-xr-x | root/root | 3516  | 2015-01-09 | 15:43:12 | local/isff/scripts/pjinstall                        |
| -rwxr-xr-x | root/root | 76    | 2015-01-09 | 15:43:11 | local/isff/scripts/reb                              |
| -rwxr-xr-x | root/root | 72    | 2015-01-09 | 15:43:12 | local/isff/scripts/ht                               |
| -rwxr-xr-x | root/root | 1219  | 2015-01-09 | 15:43:12 | local/isff/scripts/emode                            |
| -rwxr-xr-x | root/root | 19    | 2015-01-09 | 15:43:12 | local/isff/scripts/nt                               |
| -rwxr-xr-x | root/root | 1008  | 2015-01-09 | 15:43:11 | local/isff/scripts/rs                               |
| -rwxr-xr-x | root/root | 1305  | 2015-01-09 | 15:43:11 | local/isff/scripts/tp4                              |

|            |           |         |            |          |                                                                                              |
|------------|-----------|---------|------------|----------|----------------------------------------------------------------------------------------------|
| -rwxr-xr-x | root/root | 2701    | 2015-01-09 | 15:43:11 | local/isff/scripts/swgetversions                                                             |
| -rwxr-xr-x | root/root | 37      | 2015-01-09 | 15:43:12 | local/isff/scripts/ds                                                                        |
| -rwxr-xr-x | root/root | 625     | 2015-01-09 | 15:43:12 | local/isff/scripts/power_cycle_ports                                                         |
| -rwxr-xr-x | root/root | 1075    | 2015-01-09 | 15:43:11 | local/isff/scripts/start_dsm                                                                 |
| -rw-r--r-- | root/root | 6       | 2013-11-05 | 12:34:08 | local/isff/current_project                                                                   |
| drwxr-xr-x | root/root | 0       | 2015-01-09 | 15:43:01 | local/lib/                                                                                   |
| lrwxrwxrwx | root/root | 0       | 2015-01-09 | 15:43:01 | local/lib/libnidas_dynld.so -> libnidas_dynld.so.1.0                                         |
| lrwxrwxrwx | root/root | 0       | 2015-01-09 | 15:43:01 | local/lib/libnidas_dynld_raf_CMIGITS3_Serial.so.1.0                                          |
| -rwxrwxr-x | root/root | 209016  | 2015-01-09 | 15:43:00 | local/lib/libnidas_dynld_raf_CMIGITS3_Serial.so.1.0                                          |
| lrwxrwxrwx | root/root | 0       | 2015-01-09 | 15:43:01 | local/lib/libnidas_util.so.1 -> libnidas_util.so.1.0                                         |
| -rwxrwxr-x | root/root | 2665564 | 2015-01-09 | 15:42:59 | local/lib/libnidas.so.1.0                                                                    |
| lrwxrwxrwx | root/root | 0       | 2015-01-09 | 15:43:01 | local/lib/libnidas.so -> libnidas.so.1.0                                                     |
| -rwxrwxr-x | root/root | 675548  | 2015-01-09 | 15:42:58 | local/lib/libnidas_util.so.1.0                                                               |
| lrwxrwxrwx | root/root | 0       | 2015-01-09 | 15:43:01 | local/lib/libnidas_util.so -> libnidas_util.so.1.0                                           |
| lrwxrwxrwx | root/root | 0       | 2015-01-09 | 15:43:01 | local/lib/libnidas.so.1 -> libnidas.so.1.0                                                   |
| lrwxrwxrwx | root/root | 0       | 2015-01-09 | 15:43:01 | local/lib/libnidas_dynld_raf_CMIGITS3_Serial.so -> libnidas_dynld_raf_CMIGITS3_Serial.so.1.0 |
| lrwxrwxrwx | root/root | 0       | 2015-01-09 | 15:43:01 | local/lib/libnidas_dynld.so.1 -> libnidas_dynld.so.1.0                                       |
| -rwxrwxr-x | root/root | 1888680 | 2015-01-09 | 15:43:00 | local/lib/libnidas_dynld.so.1.0                                                              |
