# Supplementary material for: The Niwot Ridge Subalpine Forest US-NR1 AmeriFlux site – Part I: Data acquisition and site record-keeping
Source: Copernicus journal article supplement (doi:10.5194/gi-2016-17), 2016-06-14
Supplement: Supplementary file 14 [file gi-2016-17-supplement.zip]

```
% This is a listing of the archive of data logger programs used at the
% Niwot Ridge US-NR1 AmeriFlux site.  The order follows Table 2 in the
% paper,
%
%
% "The Niwot Ridge Subalpine Forest US-NR1 AmeriFlux site -- Part I:
%      Data acquisition and site record-keeping"
%
%
% Thu Apr  7 11:57:49 MDT 2016
% SpB  (sean.burns@colorado.edu)
```

For more info see:

[http://urquell.colorado.edu/docs\\_tower/tower\\_logger\\_info.html](http://urquell.colorado.edu/docs_tower/tower_logger_info.html)

which is also saved in this archive as:

88588 Apr 7 13:05 README\_usnr1\_data\_logger\_program\_web\_summary.pdf

```
=====
Listing of data logger programs:
```

```
%
% the files are listed in approximately reverse chronological order
% (with older files, the order, names, and attached dates are
% less certain)
%
```

```
-----
campbell_logger_code_archive/FAST:
```

```
-rwxr-xr-x 1 sburns aster 9913 Nov  2 14:44 fast_24.csi*
-rwxr-xr-x 1 sburns aster 9372 Jul 21  2015 fast_23.csi*
-rwxr-xr-x 1 sburns aster 9874 Jan  7  2014 fast_22.csi*
-rwxr-xr-x 1 sburns aster 9192 Nov 29  2013 fast_21.csi*
-rwxr-xr-x 1 sburns aster 8861 Nov 29  2013 fast_20.csi*
-rwxr-xr-x 1 sburns aster 9148 Nov 29  2013 fast_20a.csi*
-rwxr-xr-x 1 sburns aster 7539 Oct 24  2013 fast_19.csi*
-rwxr-xr-x 1 sburns aster 7878 Oct  8  2013 fast_18.csi*
-rwxr-xr-x 1 sburns aster 7470 May  7  2013 fast_17.csi*
-rwxr-xr-x 1 sburns aster 7400 Mar 28  2013 fast_16.csi*
-rwxr-xr-x 1 sburns aster 6770 Nov 15  2011 fast_15.csi*
-rwxr-xr-x 1 sburns aster 7779 Nov  4  2011 fast_14.csi*
-rwxr-xr-x 1 sburns aster 7991 Oct 22  2011 fast_13.csi*
-rwxr-xr-x 1 sburns aster 9058 May 17  2010 fast_12.csi*
-rwxr-xr-x 1 sburns aster 9444 May  5  2010 fast_11.csi*
-rwxr-xr-x 1 sburns aster 8886 Sep 27  2009 fast_10.csi*
-rwxr-xr-x 1 sburns aster 10769 Jul 10  2009 fast_09.csi*
-rwxr-xr-x 1 sburns aster 10661 Jun 25  2009 fast_08.csi*
-rwxr-xr-x 1 sburns aster 10565 Oct 24  2008 fast_07.csi*
-rwxr-xr-x 1 sburns aster 10129 Sep 30  2008 fast_06.csi*
-rwxr-xr-x 1 sburns aster 9556 Sep 26  2007 fast_05.csi*
-rwxr-xr-x 1 sburns aster 9632 Apr  3  2007 fast_04.csi*
-rwxr-xr-x 1 sburns aster 9471 Nov 26  2006 fast_03.csi*
-rwxr-xr-x 1 sburns aster 9391 Oct 24  2006 fast_02.csi*
```

|            |   |        |       |      |     |    |      |              |
|------------|---|--------|-------|------|-----|----|------|--------------|
| -rwxr-xr-x | 1 | sburns | aster | 9252 | Oct | 16 | 2006 | fast_01.csi* |
| -rw-rw-r-- | 1 | sburns | aster | 9335 | May | 26 | 2005 | FAST2X10.CSI |
| -rw-rw-r-- | 1 | sburns | aster | 9088 | Feb | 11 | 2005 | FAST23X9.CSI |
| -rw-rw-r-- | 1 | sburns | aster | 8895 | Oct | 8  | 2004 | FAST23X8.CSI |
| -rw-rw-r-- | 1 | sburns | aster | 8815 | Oct | 8  | 2004 | FAST23X7.CSI |
| -rw-rw-r-- | 1 | sburns | aster | 8503 | Oct | 22 | 2001 | FAST23X5.CSI |
| -rw-rw-r-- | 1 | sburns | aster | 8245 | Jan | 15 | 2002 | FAST23X4.CSI |
| -rw-rw-r-- | 1 | sburns | aster | 7083 | Dec | 3  | 2000 | FAST23X3.CSI |
| -rw-rw-r-- | 1 | sburns | aster | 6690 | Jan | 15 | 2002 | FAST23X2.CSI |
| -rw-rw-r-- | 1 | sburns | aster | 5009 | Sep | 26 | 2000 | FAST23X.CSI  |
| -rw-rw-r-- | 1 | sburns | aster | 5125 | Aug | 29 | 2000 | FAST30.CSI   |
| -rw-rw-r-- | 1 | sburns | aster | 7450 | Jan | 5  | 1999 | FAST23XB.CSI |
| -rw-rw-r-- | 1 | sburns | aster | 1937 | Jan | 16 | 1998 | FAST.CSI     |

campbell\_logger\_code\_archive/PROF:

|            |   |        |       |       |     |    |      |                   |
|------------|---|--------|-------|-------|-----|----|------|-------------------|
| -rwxr-xr-x | 1 | sburns | aster | 15863 | Jul | 29 | 2009 | prf_02.csi*       |
| -rwxr-xr-x | 1 | sburns | aster | 15561 | Nov | 19 | 2007 | prf_01.csi*       |
| -rw-rw-r-- | 1 | sburns | aster | 15366 | Jun | 2  | 2004 | PROF30B_new2.CSI  |
| -rwxrwxr-x | 1 | sburns | aster | 17693 | Aug | 15 | 2003 | PROF30B_new1.CSI* |
| -rw-rw-r-- | 1 | sburns | aster | 17695 | Jul | 7  | 2002 | PROF30B.CSI       |
| -rw-rw-r-- | 1 | sburns | aster | 14054 | Aug | 5  | 2002 | PROF4TB.CSI       |
| -rw-rw-r-- | 1 | sburns | aster | 14054 | Aug | 5  | 2002 | PROF4T.CSI        |
| -rw-rw-r-- | 1 | sburns | aster | 12213 | Jul | 18 | 2001 | PROF14B.CSI       |
| -rw-rw-r-- | 1 | sburns | aster | 13155 | Aug | 2  | 2001 | PROF14C.CSI       |
| -rw-rw-r-- | 1 | sburns | aster | 14000 | May | 3  | 2000 | PROF30.CSI        |
| -rw-rw-r-- | 1 | sburns | aster | 9505  | Jun | 14 | 1999 | PROF12T.CSI       |

campbell\_logger\_code\_archive/MET:

|            |   |        |       |       |     |    |      |                 |
|------------|---|--------|-------|-------|-----|----|------|-----------------|
| -rwxr-xr-x | 1 | sburns | aster | 15601 | Dec | 11 | 2014 | met_10.csi*     |
| -rwxr-xr-x | 1 | sburns | aster | 14917 | Nov | 6  | 2014 | met_09.csi*     |
| -rwxr-xr-x | 1 | sburns | aster | 12053 | Mar | 16 | 2011 | met_07.csi*     |
| -rwxr-xr-x | 1 | sburns | aster | 11779 | Dec | 13 | 2007 | met_06.csi*     |
| -rwxr-xr-x | 1 | sburns | aster | 11710 | Sep | 26 | 2007 | met_05.csi*     |
| -rwxr-xr-x | 1 | sburns | aster | 11250 | Jun | 14 | 2007 | met_04.csi*     |
| -rwxr-xr-x | 1 | sburns | httpd | 10481 | May | 30 | 2007 | met_03.csi*     |
| -rwxr-xr-x | 1 | sburns | httpd | 10457 | May | 30 | 2007 | met_02.csi*     |
| -rwxr-xr-x | 1 | sburns | aster | 9838  | Apr | 23 | 2007 | met_01.csi*     |
| -rw-rw-r-- | 1 | sburns | aster | 8744  | May | 15 | 2003 | MET30D_new1.CSI |
| -rw-rw-r-- | 1 | sburns | aster | 8800  | May | 13 | 2003 | MET30D.CSI      |
| -rw-rw-r-- | 1 | sburns | aster | 7732  | Jul | 23 | 2001 | MET30C.CSI      |
| -rw-rw-r-- | 1 | sburns | aster | 6945  | Oct | 16 | 2000 | MET30B.CSI      |
| -rw-rw-r-- | 1 | sburns | aster | 6985  | Oct | 16 | 2000 | MET30A.CSI      |
| -rw-rw-r-- | 1 | sburns | aster | 6161  | Jul | 5  | 2000 | MET30A_ver1.CSI |
| -rw-rw-r-- | 1 | sburns | aster | 6486  | Jan | 12 | 2000 | MET30.CSI       |
| -rw-rw-r-- | 1 | sburns | aster | 6307  | Feb | 25 | 2003 | MET21X.CSI      |
| -rw-rw-r-- | 1 | sburns | aster | 6131  | Sep | 21 | 1999 | MET.CSI         |

campbell\_logger\_code\_archive/SOIL:

|            |   |        |       |       |     |   |      |                   |
|------------|---|--------|-------|-------|-----|---|------|-------------------|
| -rwxr-xr-x | 1 | sburns | aster | 12138 | Oct | 7 | 2008 | soil_03.csi*      |
| -rwxr-xr-x | 1 | sburns | aster | 7475  | Oct | 7 | 2008 | soil_03c.csi*     |
| -rwxr-xr-x | 1 | sburns | aster | 7353  | Oct | 7 | 2008 | soil_03b.csi*     |
| -rwxr-xr-x | 1 | sburns | aster | 14379 | Oct | 1 | 2008 | soil_03_oct1.csi* |

```

-rwxr-xr-x 1 sburns aster 10953 Oct 26 2007 soil_02.csi*
-rwxr-xr-x 1 sburns aster 10584 Oct 16 2005 soil_01.csi*
-rw-rw-r-- 1 sburns aster 9659 Jun 30 2005 SOILSNO2.CSI
-rw-rw-r-- 1 sburns aster 3138 Oct 19 2004 SOILHYD.CSI
-rw-rw-r-- 1 sburns aster 2449 Oct 14 2004 SOILHYD2.CSI
-rw-rw-r-- 1 sburns aster 4522 Dec 10 2004 SOILHY.CSI
-rw-rw-r-- 1 sburns aster 9309 Oct 29 2003 SOILSNOW.CSI
-rw-rw-r-- 1 sburns aster 6510 Aug 3 2003 SOIL23XC.CSI
-rw-rw-r-- 1 sburns aster 7073 May 15 2003 SOIL23XB.CSI
-rw-rw-r-- 1 sburns aster 13007 Jun 22 1999 SOIL_TDP.CSI
-rw-rw-r-- 1 sburns aster 13007 Jun 22 1999 SOIL2TDP.CSI
-rw-rw-r-- 1 sburns aster 12203 Jul 22 1998 SOILSAP.CSI
-rw-rw-r-- 1 sburns aster 5999 Nov 10 1998 SOIL.CSI
-rw-rw-r-- 1 sburns aster 10805 Jul 7 1998 SOILTEMP.CSI
-rw-rw-r-- 1 sburns aster 3968 Jun 8 1998 SOIL23.CSI

```

#### campbell\_logger\_code\_archive/CNR:

```

-rwxr-xr-x 1 sburns aster 9036 Nov 19 2007 rad_03.csi*
-rwxr-xr-x 1 sburns aster 8856 Sep 13 2006 rad_02.csi*
-rwxr-xr-x 1 sburns aster 7738 Dec 21 2005 rad_01.csi*
-rwxr-xr-x 1 sburns aster 7964 Dec 16 2005 rad_01_old.csi*
-rw-rw-r-- 1 sburns aster 6361 Oct 4 2004 RAD.CSI
-rw-rw-r-- 1 sburns aster 5128 Jun 4 2004 CNR30B.CSI
-rw-rw-r-- 1 sburns aster 4873 Jun 2 2003 CNR30.CSI
-rw-rw-r-- 1 sburns aster 4873 Jul 5 2002 CNR30_ver2.CSI
-rw-rw-r-- 1 sburns aster 4603 Mar 1 2000 CNR30_ver1.CSI
-rw-rw-r-- 1 sburns aster 4708 Sep 21 1999 CNR3.CSI
-rw-rw-r-- 1 sburns aster 4642 Aug 25 1999 CNR2.CSI
-rw-rw-r-- 1 sburns aster 3479 Aug 25 1999 CNR21X.CSI
-rw-rw-r-- 1 sburns aster 2866 Jul 8 1999 CNR1.CSI

```

#### campbell\_logger\_code\_archive/UC:

```

-rwxr-xr-x 1 sburns aster 5162 Sep 26 2014 uc_06.csi*
-rwxr-xr-x 1 sburns aster 4657 Nov 7 2013 uc_05.csi*
-rwxr-xr-x 1 sburns aster 5621 Oct 24 2013 uc_04.csi*
-rwxr-xr-x 1 sburns aster 4840 Oct 24 2013 uc_04b.csi*
-rwxr-xr-x 1 sburns aster 8201 Aug 4 2009 uc_03.csi*
-rwxr-xr-x 1 sburns aster 8082 Jul 29 2009 uc_02.csi*
-rwxr-xr-x 1 sburns aster 7991 Aug 11 2008 uc_01.csi*
-rw-rw-r-- 1 sburns aster 10165 Jul 14 2005 UC01.CSI
-rw-rw-r-- 1 sburns aster 8796 Jan 20 2005 TWOSONIC.CSI
-rw-rw-r-- 1 sburns aster 8286 Nov 9 2004 TWOSONIC_ver4.CSI
-rw-rw-r-- 1 sburns aster 8485 Jun 5 2003 TWOSONIC_ver3.CSI
-rw-rw-r-- 1 sburns aster 8485 Oct 6 2002 TWOSONIC_ver2.CSI
-rw-rw-r-- 1 sburns aster 3595 Jan 24 2002 FAST23UC.CSI
-rw-rw-r-- 1 sburns aster 5125 Sep 7 2000 TWOSONIC_ver1.CSI
-rw-rw-r-- 1 sburns aster 5712 Feb 6 2001 FASTUC.CSI

```

#### campbell\_logger\_code\_archive/TC:

```

-rwxr-xr-x 1 sburns aster 7481 Mar 21 2014 tc_13.csi*
-rwxr-xr-x 1 sburns aster 8737 Oct 13 2006 tc_12.csi*
-rwxr-xr-x 1 sburns aster 7331 Oct 12 2006 tc_11.csi*

```

```

-rwxr-xr-x 1 sburns aster 7208 Oct 6 2006 tc_10.csi*
-rwxr-xr-x 1 sburns aster 7711 Oct 5 2006 tc_09.csi*
-rwxr-xr-x 1 sburns aster 7300 Sep 29 2006 tc_08.csi*
-rwxr-xr-x 1 sburns aster 6477 Sep 24 2006 tc_07.csi*
-rwxr-xr-x 1 sburns aster 6783 Aug 31 2006 tc_06.csi*
-rwxr-xr-x 1 sburns aster 6641 Aug 29 2006 tc_05.csi*
-rwxr-xr-x 1 sburns aster 6107 Aug 24 2006 tc_04.csi*
-rwxr-xr-x 1 sburns aster 5092 Aug 22 2006 tc_03.csi*
-rwxr-xr-x 1 sburns aster 5722 Sep 15 2005 tc_02.csi*
-rw-rw-r-- 1 sburns aster 7019 Jul 19 2005 tc_01.csi

```

#### campbell\_logger\_code\_archive/MRS:

```

-rwxr-xr-x 1 sburns aster 13340 Sep 23 2008 mrs_03b.csi*
-rwxr-xr-x 1 sburns aster 13265 Aug 11 2008 mrs_03a.csi*
-rwxr-xr-x 1 sburns aster 13193 Oct 4 2007 mrs_02.csi*
-rwxr-xr-x 1 sburns aster 13279 Oct 26 2007 mrs_02a.csi*
-rwxr-xr-x 1 sburns aster 12907 Oct 12 2006 mrs_01.csi*
-rw-rw-r-- 1 sburns aster 12758 Nov 8 2001 MRSTEMP.CSI

```

#### campbell\_logger\_code\_archive/NCARTC:

```

-rwxr-xr-x 1 sburns aster 2939 May 1 2015 nctc_05.csi*
-rwxr-xr-x 1 sburns aster 4839 Nov 6 2014 nctc_04.csi*
-rwxr-xr-x 1 sburns aster 4705 Apr 24 2014 nctc_03.csi*
-rwxr-xr-x 1 sburns aster 2363 Oct 25 2005 nctc_02.csi*
-rwxr-xr-x 1 sburns aster 2770 Aug 29 2005 nctc_01.csi*
-rw-rw-r-- 1 sburns aster 2363 Oct 3 2004 NCARTC.CSI
-rw-rw-r-- 1 sburns aster 2160 Aug 20 2002 NCARTC_ver1.CSI

```

#### campbell\_logger\_code\_archive/UCB:

```

-rwxr-xr-x 1 sburns aster 9463 Nov 8 2012 ucb_17.csi*
-rwxr-xr-x 1 sburns aster 8474 Oct 31 2012 ucb_16.csi*
-rwxr-xr-x 1 sburns aster 8158 Nov 4 2011 ucb_15.csi*
-rwxr-xr-x 1 sburns aster 7716 Oct 5 2011 ucb_14.csi*
-rwxr-xr-x 1 sburns aster 9011 Sep 20 2010 ucb_13.csi*
-rwxr-xr-x 1 sburns aster 8788 Aug 11 2010 ucb_12.csi*
-rwxr-xr-x 1 sburns aster 8700 Nov 6 2009 ucb_11.csi*
-rwxr-xr-x 1 sburns aster 5185 Feb 22 2008 ucb10x_2.csi*
-rwxr-xr-x 1 sburns aster 5111 Feb 21 2008 ucb10x_1.csi*
-rwxr-xr-x 1 sburns aster 8088 Oct 31 2008 ucb_10.csi*
-rwxr-xr-x 1 sburns aster 7472 Aug 11 2008 ucb_09.csi*
-rwxr-xr-x 1 sburns aster 6299 Jul 17 2007 ucb_08.csi*
-rwxr-xr-x 1 sburns aster 5595 Sep 20 2006 ucb_07_notused.csi*
-rwxr-xr-x 1 sburns aster 6190 Oct 1 2006 ucb_07.csi*
-rwxr-xr-x 1 sburns aster 5445 Sep 19 2006 ucb_06.csi*
-rwxr-xr-x 1 sburns aster 4852 Oct 25 2005 ucb_05.csi*
-rwxr-xr-x 1 sburns aster 4783 Oct 15 2005 ucb_04.csi*
-rwxr-xr-x 1 sburns aster 4607 Oct 8 2005 ucb_03.csi*
-rwxr-xr-x 1 sburns aster 4053 Sep 20 2005 ucb_02.csi*
-rw-rw-r-- 1 sburns aster 3503 Jul 21 2005 ucb_01.csi

```

#### campbell\_logger\_code\_archive/MARK:

```

-rwxr-xr-x 1 sburns aster 5010 Nov 2 09:27 mark_11.csi*
-rwxr-xr-x 1 sburns aster 4855 Oct 13 13:52 mark_10.csi*
-rwxr-xr-x 1 sburns aster 4812 Sep 21 2015 mark_09.csi*
-rwxr-xr-x 1 sburns aster 4728 Sep 4 2015 mark_08.csi*
-rwxr-xr-x 1 sburns aster 4358 Aug 14 2015 mark_07.csi*
-rwxr-xr-x 1 sburns aster 4260 Aug 6 2015 mark_06.csi*
-rwxr-xr-x 1 sburns aster 4108 Jul 21 2015 mark_05.csi*
-rwxr-xr-x 1 sburns aster 4088 Jul 16 2015 mark_04.csi*
-rwxr-xr-x 1 sburns aster 3901 Jun 24 2015 mark_03.csi*
-rwxr-xr-x 1 sburns aster 3002 Nov 6 2014 mark_02.csi*
-rwxr-xr-x 1 sburns aster 2761 Oct 30 2014 mark_01.csi*

```

campbell\_logger\_code\_archive/MISC\_cr3000:

\* code used with CPEC200 and CR3000

```

-rwxr-xr-x 1 sburns aster 159554 Oct 24 2013 Cpec200_v1_4_01_2.cr3*
-rwxr-xr-x 1 sburns aster 160310 Oct 23 2013 Cpec200_v1_4_01_3.cr3*
-rw-r--r-- 1 sburns aster 160586 Jul 11 2014 Cpec200_v1_4_01_4.cr3
-rw-r--r-- 1 sburns aster 160654 Jul 11 2014 Cpec200_v1_4_01_5.cr3
-rw-r--r-- 1 sburns aster 160654 Jul 11 2014 Cpec200_v1_4_01_6.cr3
-rw-r--r-- 1 sburns aster 160655 Jul 11 2014 Cpec200_v1_4_01_7.cr3
-rw-r--r-- 1 sburns aster 160586 Jul 17 2014 Cpec200_v1_4_01_8.cr3
-rw-r--r-- 1 sburns aster 160619 Jul 30 2014 Cpec200_v1_4_01_9.cr3

```

\* Similar to FAST CR23X logger code, but for a CR3000 data logger:

```

-rw-r--r-- 1 sburns aster 4747 Aug 31 2014 Nr1_fast_0_0_01.cr3
-rw-r--r-- 1 sburns aster 4968 Sep 3 2014 Nr1_fast_0_0_02.cr3
-rw-r--r-- 1 sburns aster 5017 Sep 15 2014 Nr1_fast_0_0_03.cr3
-rw-r--r-- 1 sburns aster 5021 Sep 12 2014 Nr1_fast_0_0_03_ver1.cr3
-rw-r--r-- 1 sburns aster 4638 Aug 3 2014 Nr1_fast.cr3

```

campbell\_logger\_code\_archive/MISC\_cr3000:

\* these are various other misc logger programs that have been used at the site.

```

-rwxr-xr-x 1 sburns aster 5061 Sep 21 2015 noah_150921.dld*
-rwxr-xr-x 1 sburns aster 28564 Nov 16 2007 noah_m.csi*
-rwxr-xr-x 1 sburns aster 6246 Jun 23 2004 brant21x.csi*
drwxrwxr-x 6 sburns aster 4096 Jan 14 2004 Data.jed/
-rwxrwxr-x 1 sburns aster 4019 Jul 3 2003 21sonic.csi*
-rw-rw-r-- 1 sburns aster 6901 Nov 9 2001 AUTODEND.CSI
-rw-rw-r-- 1 sburns aster 10584 Sep 18 2001 MTOWER.CSI
-rw-rw-r-- 1 sburns aster 7554 Aug 1 2001 AUTODEN2.CSI
-rw-rw-r-- 1 sburns aster 2022 Jul 16 2001 PARBALL.CSI
-rw-rw-r-- 1 sburns aster 1832 Jun 2 2000 TRAC.CSI
-rw-rw-r-- 1 sburns aster 10674 Mar 13 2000 3D_7500.CSI
-rw-rw-r-- 1 sburns aster 6307 Aug 30 1999 LIGHT2.CSI
-rw-rw-r-- 1 sburns aster 32016 Aug 19 1999 HREA2.CSI
-rw-rw-r-- 1 sburns aster 13007 Jun 22 1999 SOIL2TDP.CSI
-rw-rw-r-- 1 sburns aster 13007 Jun 22 1999 SOIL_TDP.CSI
-rw-rw-r-- 1 sburns aster 6131 May 26 1999 LIGHT.CSI

```

|            |   |        |       |       |     |    |      |              |
|------------|---|--------|-------|-------|-----|----|------|--------------|
| -rw-rw-r-- | 1 | sburns | aster | 5999  | Nov | 10 | 1998 | SOIL.CSI     |
| -rw-rw-r-- | 1 | sburns | aster | 12203 | Jul | 22 | 1998 | SOILSAP.CSI  |
| -rw-rw-r-- | 1 | sburns | aster | 10805 | Jul | 7  | 1998 | SOILTEMP.CSI |
| -rw-rw-r-- | 1 | sburns | aster | 3968  | Jun | 8  | 1998 | SOIL23.CSI   |
| -rw-rw-r-- | 1 | sburns | aster | 30943 | Apr | 22 | 1998 | HREA.CSI     |
