# Supplementary material for: The Niwot Ridge Subalpine Forest US-NR1 AmeriFlux site – Part I: Data acquisition and site record-keeping
Source: Copernicus journal article supplement (doi:10.5194/gi-2016-17), 2016-06-14
Supplement: Supplementary file 15 [file gi-2016-17-supplement.zip]

***Supplemental File for “The Niwot Ridge Subalpine Forest US-NR1 AmeriFlux site – Part I: Data acquisition and site record-keeping”  
by S. P. Burns et al.***

**README for: USNR1\_5minute\_statistics\_files.zip**

**S. P. Burns et al.**

sean@ucar.edu

Date: April 19, 2016

This is an archive of the 5-min netCDF statistics data-files calculated by the ASTER and NIDAS software for 15 November for each year the tower was in operation. In order to view the variables and extract the data use netCDF tools, such as ncdump (i.e., “ncdump -h nwt.121115.nc”) available from Unidata (<http://www.unidata.ucar.edu/>)

The files included are:

```
-rw-rw-r-- 1 sburns aster 73836 Nov 20 1998 nwt.981115.nc
-rw-rw-r-- 1 sburns aster 150244 Nov 15 1999 nwt.991115.nc
-rw-rw-r-- 1 sburns aster 245080 Nov 16 2000 nwt.001115.nc
-rw-rw-r-- 1 sburns aster 242144 Nov 16 2001 nwt.011115.nc
-rw-rw-r-- 1 sburns aster 260524 Nov 16 2002 nwt.021115.nc
-rw-rw-r-- 1 sburns aster 106900 Nov 14 2003 nwt.031115.nc
-rw-rw-r-- 1 sburns aster 286828 Nov 16 2004 nwt.041115.nc
-rw-rw-r-- 1 sburns aster 298932 Jan 6 2006 nwt.051115.nc
-rw-rw-r-- 1 sburns aster 291988 Nov 16 2006 nwt.061115.nc
-rw-rw-r-- 1 sburns aster 292048 Nov 16 2007 nwt.071115.nc
-rw-rw-r-- 1 sburns aster 306620 Nov 16 2008 nwt.081115.nc
-rw-rw-r-- 1 sburns aster 334444 Nov 16 2009 nwt.091115.nc
-rw-rw-r-- 1 sburns aster 334440 Nov 16 2010 nwt.101115.nc
-rw-rw-r-- 1 sburns aster 338524 Nov 16 2011 nwt.111115.nc
-rw-rw-r-- 1 sburns aster 342456 Jan 10 2013 nwt.121115.nc
-rw-rw-r-- 1 sburns aster 328228 Nov 16 2013 nwt.131115.nc
-rw-rw-r-- 1 sburns aster 353996 Jan 20 2015 niwot_20141115.nc
-rw-rw-r-- 1 sburns aster 210356 Nov 16 17:06 niwot_20151115.nc
```
